# Supplementary material for: Na2Fe2OS2, a new earth abundant oxysulphide cathode material for Na-ion batteries
Source: Royal Society of Chemistry journal article supplement (doi:10.1039/d0ta07966a), 2020-01-01
Supplement: d0ta07966a1.pdf [file d0ta07966a1.pdf]

## Supplementary Information

### **Na<sub>2</sub>Fe<sub>2</sub>OS<sub>2</sub>, a new earth abundant oxysulphide cathode material for Na-ion batteries**

Jacinthe Gamon<sup>1,\*</sup> & Arnaud J. Perez<sup>1,\*</sup>, Leanne A. H. Jones<sup>2,3</sup>, Marco Zanella<sup>1</sup>, Luke M. Daniels<sup>1</sup>, Rhun E. Morris<sup>1</sup>, Chiu C. Tang<sup>4</sup>, Tim D. Veal<sup>2,3</sup>, Laurence J. Hardwick<sup>1,2</sup>, Matthew S. Dyer<sup>1</sup>, John B. Claridge<sup>1</sup> and Matthew J. Rosseinsky<sup>1,||</sup>

<sup>1</sup>Department of Chemistry, University of Liverpool, Crown Street, Liverpool, L69 7ZD, United Kingdom

<sup>2</sup>Stephenson Institute for Renewable Energy, University of Liverpool, Chadwick Building, Peach Street, Liverpool, L69 7ZF, United Kingdom

<sup>3</sup>Department of Physics, University of Liverpool, Oliver Lodge Laboratory, Oxford Street, Liverpool L69 7ZE, United Kingdom

<sup>4</sup>Diamond Light Source Ltd, Harwell Science and Innovation Campus, Didcot, OX11 0DE, United Kingdom

\* These authors contributed equally to the work.

|| Corresponding author: [rossein@liverpool.ac.uk](mailto:rossein@liverpool.ac.uk)

## Content

|                                                                                                                                                   |           |
|---------------------------------------------------------------------------------------------------------------------------------------------------|-----------|
| <b>1. Na<sub>2</sub>Fe<sub>2</sub>OS<sub>2</sub> synthesized via solid state route (Na<sub>2</sub>Fe<sub>2</sub>OS<sub>2</sub>-SS) .....</b>      | <b>3</b>  |
| 1.1. Structure .....                                                                                                                              | 3         |
| 1.2. Improving purity of the Na <sub>2</sub> Fe <sub>2</sub> OS <sub>2</sub> phase: solid state synthesis attempts ....                           | 6         |
| 1.2.1. Reaction time .....                                                                                                                        | 6         |
| 1.2.2. Reaction temperature .....                                                                                                                 | 7         |
| 1.2.3. Different precursors .....                                                                                                                 | 8         |
| 1.2.4. Deviation from stoichiometry .....                                                                                                         | 9         |
| <b>2. Na<sub>2</sub>Fe<sub>2</sub>OS<sub>2</sub> synthesized via solid mechanosynthesis (Na<sub>2</sub>Fe<sub>2</sub>OS<sub>2</sub>-MW) .....</b> | <b>10</b> |
| 2.1. Optimization of the mechanosynthesis procedure .....                                                                                         | 10        |
| 2.2. Composition and microstructure.....                                                                                                          | 14        |
| 2.2.1. Le Bail fitting of the mechanosynthesized sample Na <sub>2</sub> Fe <sub>2</sub> OS <sub>2</sub> -MW .....                                 | 15        |
| 2.2.2. Determination of the amount of amorphous content in Na <sub>2</sub> Fe <sub>2</sub> OS <sub>2</sub> -MW                                    | 15        |
| 2.2.3. Elemental analysis.....                                                                                                                    | 18        |
| 2.3. Structure of mechanosynthesized Na <sub>2</sub> Fe <sub>2</sub> OS <sub>2</sub> (Na <sub>2</sub> Fe <sub>2</sub> OS <sub>2</sub> -MW) .....  | 19        |
| 2.4. Infrared spectroscopy .....                                                                                                                  | 23        |
| <b>3. Study of electrochemical properties .....</b>                                                                                               | <b>26</b> |
| 3.1. Rate capability of Na <sub>2</sub> Fe <sub>2</sub> OS <sub>2</sub> .....                                                                     | 26        |
| 3.2. Reversibility of phase transition to Na <sub>1.7</sub> Fe <sub>2</sub> OS <sub>2</sub> .....                                                 | 27        |
| 3.3. Structure determination of the partially charged sample Na <sub>1.7</sub> Fe <sub>2</sub> OS <sub>2</sub> .....                              | 28        |
| 3.4. Local structure around Fe atoms by EXAFS analysis.....                                                                                       | 34        |
| 3.5. Cathode degradation at high voltage and after long cycling. ....                                                                             | 41        |
| <b>4. Literature search.....</b>                                                                                                                  | <b>42</b> |
| <b>References .....</b>                                                                                                                           | <b>43</b> |

## 1. Na<sub>2</sub>Fe<sub>2</sub>OS<sub>2</sub> synthesized via solid state route (Na<sub>2</sub>Fe<sub>2</sub>OS<sub>2</sub>-SS)

### 1.1. Structure

A Rietveld refinement was performed, by using the structural model found for analogous Na<sub>2</sub>Fe<sub>2</sub>OSe<sub>2</sub>, in which selenium atoms were swapped with sulphur atoms. This model fit well with our data and details and the outcome of the refinement can be found in Table S1 and S2. For the sake of realism, all uncertainties were multiplied by Berar's factor for all refinements (equal to 4.2 according to FullProf).<sup>[1]</sup> During the final stage of the fit, the composition of the main phase refined to Na<sub>1.98(2)</sub>Fe<sub>1.94(2)</sub>S<sub>2.00(2)</sub>O. Because the site occupancy factors (*sof*) of Na and S refined to 1 within error, these were fixed as 1 and the final composition of Na<sub>2</sub>Fe<sub>2</sub>OS<sub>2</sub>-SS written as Na<sub>2</sub>Fe<sub>1.94(2)</sub>S<sub>2</sub>O. When refined as anisotropic, a strong difference between atomic displacement parameters (*adp*)  $B_{11}$ ,  $B_{22}$  and  $B_{33}$  of Fe could be found along with a drop in the conventional reliability factors ( $\chi^2$  decreased from 18.8 to 16.8) and a reduced residual density in the Fourier difference map around the Fe site. However, for other atoms, this was not the case which supported the use of isotropic *adp* for modelling displacements for Na, S and O. An alternative refinement, where Fe is split into two sites along the c axis and half occupied did not lead to an improved fit. In order to validate this model comprising Fe deficiencies, *sof* of Na, Fe and S were fixed to their ideal value of 1, while maintaining other parameters fixed. The conventional reliability factors increased from 3.97 and 16.8 to 4.41 and 17.4 for  $R_{\text{bragg}}$  and  $\chi^2$  respectively. Also, the combined refinement of *adp*, with *sof* fixed to 1, led to a negative value for the *adp* of S and O (-0.03 and -0.16 respectively), indicating the need for stronger electron density on these sites (or lower on the other sites). These results indicated the presence of Fe vacancies up to 3(1) %, which could be explained by the presence of partially oxidized iron into Fe<sup>3+</sup>, or a p-type doping.

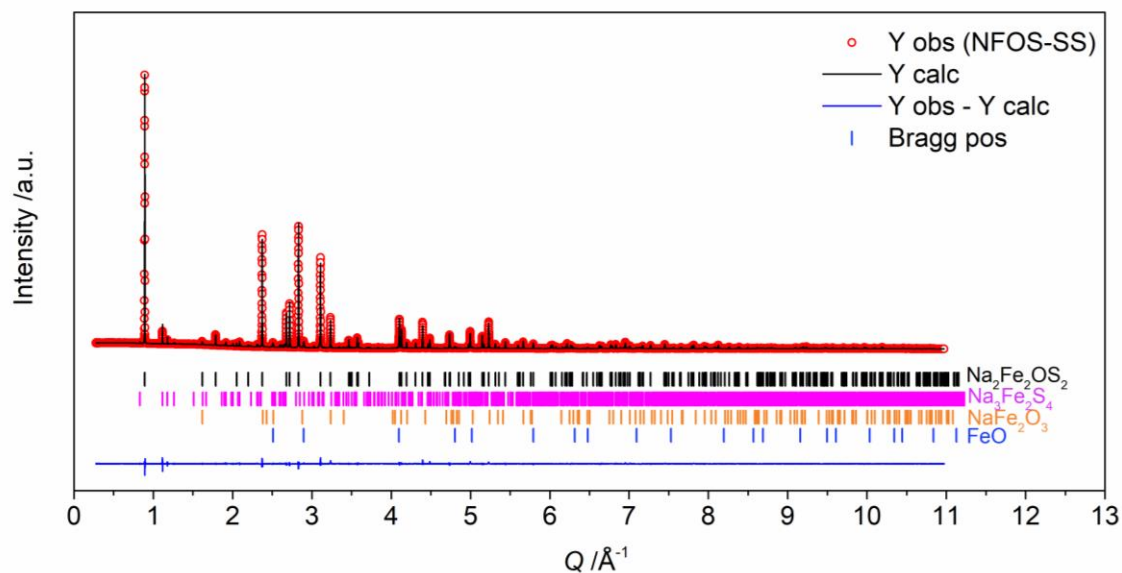

Figure S1. Final Rietveld refinement of the synchrotron X-ray diffraction pattern of Na<sub>2</sub>Fe<sub>2</sub>OS<sub>2</sub> (Diamond light source, I11 beam line,  $\lambda = 0.824605$  Å) prepared by solid-state route (Na<sub>2</sub>Fe<sub>2</sub>OS<sub>2</sub>-SS) with  $I_{\text{obs}}$  (red dots),  $I_{\text{calc}}$  (black line),  $I_{\text{obs}} - I_{\text{calc}}$  (blue line), and Bragg reflections (black tick marks for Na<sub>2</sub>Fe<sub>2</sub>OS<sub>2</sub>, pink tick marks for Na<sub>3</sub>Fe<sub>2</sub>S<sub>4</sub>, orange tick marks NaFe<sub>2</sub>O<sub>3</sub> and blue tick marks for FeO).

Table S1. Result of the Rietveld refinement of Na<sub>2</sub>Fe<sub>2</sub>OS<sub>2</sub> prepared by solid state reaction route (Na<sub>2</sub>Fe<sub>2</sub>OS<sub>2</sub>-SS)

| Identifier                                                             | Na <sub>2</sub> Fe <sub>2</sub> OS <sub>2</sub> -SS    |
|------------------------------------------------------------------------|--------------------------------------------------------|
| Radiation                                                              | SXRD                                                   |
| Empirical formula                                                      | Na <sub>2</sub> Fe <sub>1.94(2)</sub> S <sub>2</sub> O |
| Formula weight (g·mol <sup>-1</sup> )                                  | 237.8                                                  |
| Space group                                                            | <i>I4/mmm</i>                                          |
| Z                                                                      | 2                                                      |
| Density (g·cm <sup>-3</sup> )                                          | 3.412                                                  |
| Temperature (K)                                                        | 298                                                    |
| Wavelength (Å)                                                         | 0.824605                                               |
| d spacing range (Å)                                                    | 0.5726 – 22.6275                                       |
| 2 $\theta$ (°) range                                                   | 2.0840 - 92.1120                                       |
| 2 $\theta$ (°) step                                                    | 0.004                                                  |
| No. of reflections                                                     | 240                                                    |
| No. of refined parameters                                              | 19                                                     |
| <i>a</i> (Å)                                                           | 4.04222(1)                                             |
| <i>c</i> (Å)                                                           | 14.07319(9)                                            |
| Volume (Å <sup>3</sup> )                                               | 229.950(2)                                             |
| <i>R</i> <sub>p</sub>                                                  | 10.6                                                   |
| <i>R</i> <sub>wp</sub>                                                 | 9.89                                                   |
| <i>R</i> <sub>exp</sub>                                                | 2.29                                                   |
| <i>R</i> <sub>Bragg</sub>                                              | 4.29                                                   |
| $\chi^2$                                                               | 18.7                                                   |
| $\rho_{\text{min./max.}}$ residuals (e <sup>-</sup> ·Å <sup>-3</sup> ) | [-0.85 / +1.63]                                        |

Table S2. Atomic positions, isotropic ( $B_{\text{iso}}$ ), anisotropic ( $B_{11}$ ,  $B_{22}$ ,  $B_{33}$ ) and equivalent ( $B_{\text{eq}}$ ) atomic displacement parameters, and site occupancy factor ( $\text{sof}$ ) for  $\text{Na}_2\text{Fe}_2\text{OS}_2$ ,  $\text{Na}_2\text{Fe}_2\text{OS}_2\text{-SS}$ .

| Site | Wyckoff position | x | y   | z         | sof      | $B_{\text{iso}} / B_{11}, B_{22}, B_{33}, B_{\text{eq}}$<br>( $\text{\AA}^2$ ) |
|------|------------------|---|-----|-----------|----------|--------------------------------------------------------------------------------|
| Na   | 4e               | 0 | 0   | 0.1764(2) | 1        | 0.71(8)                                                                        |
| Fe   | 4c               | 0 | 0.5 | 0         | 0.972(8) | 0.0(3), 0.00(1), 0.48(3),<br>0.32(6)                                           |
| S    | 4e               | 0 | 0   | 0.3774(2) | 1        | 0.10(4)                                                                        |
| O    | 2a               | 0 | 0   | 0         | 1        | 0.2(2)                                                                         |

## 1.2. Improving purity of the $\text{Na}_2\text{Fe}_2\text{OS}_2$ phase: solid state synthesis attempts

In order to improve the purity of the sample, different synthesis conditions such as temperature, quenching procedure, the use of different precursors, of oxygen getters, as well as slight deviation from stoichiometry were varied. Unfortunately, none of these conditions improved the purity of the sample. The results are summarized below.

### 1.2.1. Reaction time

The first step of the synthesis reaction at 500 °C was maintained for 20 hours, whereas the annealing time at 600 °C during the second step was varied (3, 6 and 12 hours). Impurities present after 3 h reaction are  $\text{Na}_3\text{Fe}_2\text{S}_4$  and  $\text{NaFeO}_2$  (Figure S2, bottom). After 6 hours, the amount of these impurity phases decreases slightly compared to the main  $\text{Na}_2\text{Fe}_2\text{OS}_2$  phase, and a new impurity of FeO can be observed (Figure S2, middle). After 12 hours, the amount of FeO greatly increased, while  $\text{Na}_3\text{Fe}_2\text{S}_4$  impurity remains, with a slight increase of the peak intensity (Figure S2, top). These results suggest that the  $\text{Na}_2\text{Fe}_2\text{OS}_2$  phase is unstable at 600 °C and decomposes to  $\text{Na}_3\text{Fe}_2\text{S}_4$  and FeO.

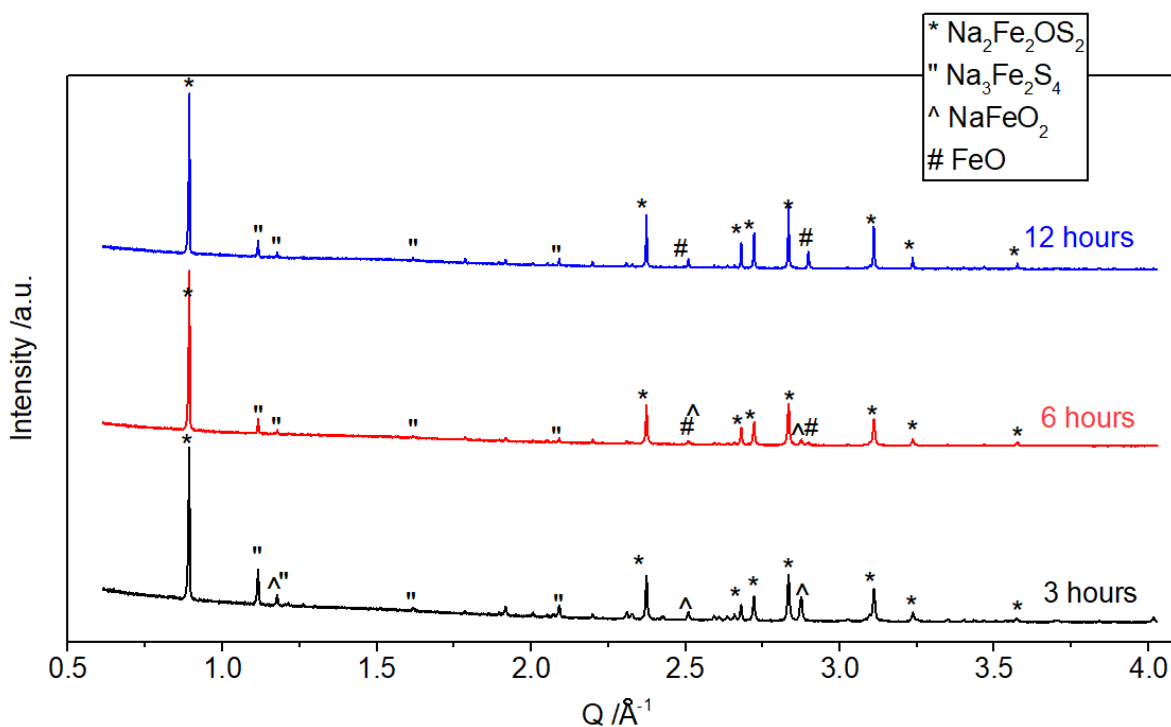

Figure S2. XRD patterns of samples prepared using Na metal,  $\text{Fe}_2\text{O}_3$ ,  $\text{FeS}$  and  $\text{S}$ , reacted at  $500\text{ }^\circ\text{C}$  for 20 hours, reground and reannealed at  $600\text{ }^\circ\text{C}$  for different amount of times (in legend).  $\lambda = 1.5406\text{ \AA}$ .

### 1.2.2. Reaction temperature

A synthesis using a lower temperature of  $550\text{ }^\circ\text{C}$  resulted in a less pure sample, with hardly any  $\text{Na}_2\text{Fe}_2\text{OS}_2$  phase (Figure S3, bottom). As such, in an attempt to stabilize the kinetic phase, as opposed to the thermodynamic phases  $\text{Na}_3\text{Fe}_2\text{S}_4$  and  $\text{FeO}$ , the annealing temperature was increased to  $700\text{ }^\circ\text{C}$  and  $900\text{ }^\circ\text{C}$ , the sample was left at this temperature for 1 hour and the reaction was then quenched in ice water. At these temperatures, the precursor mixture melted and the phase  $\text{Na}_2\text{Fe}_2\text{OS}_2$  was not identified in the sample (Figure S3, top). These results suggest that an optimal temperature of  $600\text{ }^\circ\text{C}$  is needed to favor the growth of the desired phase while preventing its decomposition. Moreover, quenching the reaction from  $600\text{ }^\circ\text{C}$  after 12 hours of reaction, does not improve the purity of the sample, suggesting that the decomposition occurred during the annealing step.

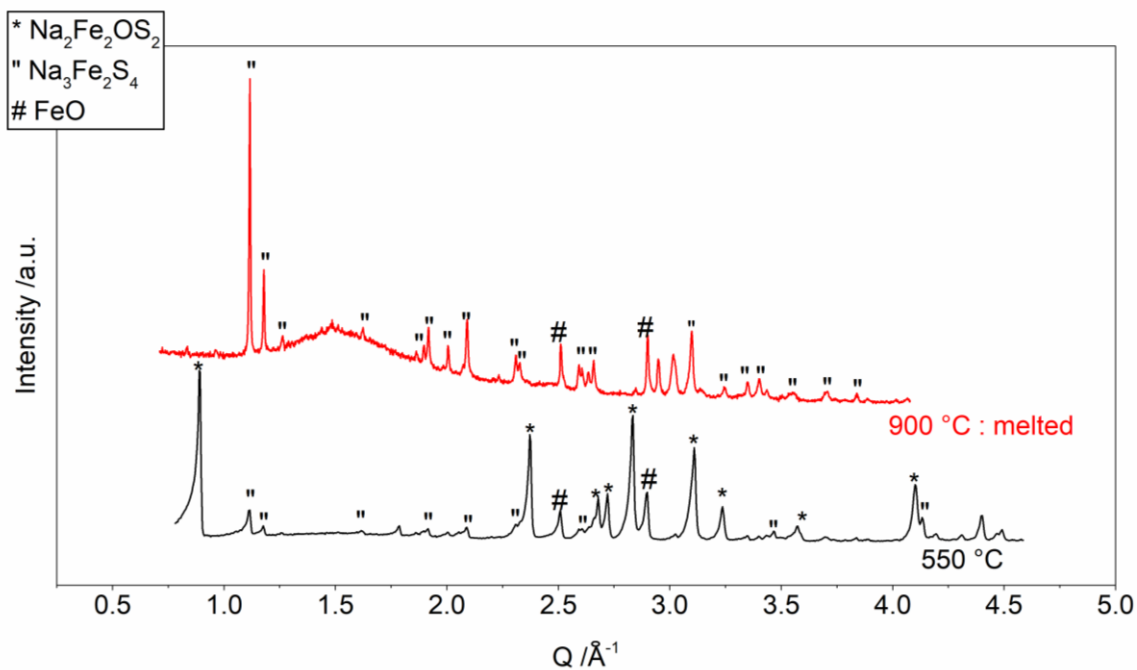

Figure S3. XRD patterns of samples reacted at different temperature for 6 hours  $\lambda = 1.5406 \text{ \AA}$  (red curve)  $\lambda = 0.709032 \text{ \AA}$  (black curve).

### 1.2.3. Different precursors

After the first step at  $500 \text{ }^\circ\text{C}$ , phases present are  $\text{Na}_3\text{Fe}_2\text{S}_4$ ,  $\text{Na}_2\text{S}$ ,  $\text{FeS}$ ,  $\text{Fe}_3\text{O}_4$  and  $\text{NaFeO}_2$ . Other precursors were then considered in order to stabilize the kinetic phase  $\text{Na}_2\text{Fe}_2\text{OS}_2$ .  $\text{Na}_2\text{S}$ ,  $\text{FeS}$ ,  $\text{Fe}_2\text{O}_3$  and  $\text{Fe}$  on the one hand and  $\text{Na}_2\text{O}$  and  $\text{FeS}$  on the other hand, where Na and Fe are already in the same oxidation state as in  $\text{Na}_2\text{Fe}_2\text{OS}_2$ , where used. After reacting at  $600 \text{ }^\circ\text{C}$  for 6 hours, the amount of  $\text{FeO}$  and  $\text{Na}_3\text{Fe}_2\text{S}_4$  impurity was higher than when Na metal and  $\text{Fe}_2\text{O}_3$  precursors were used (Figure S4).



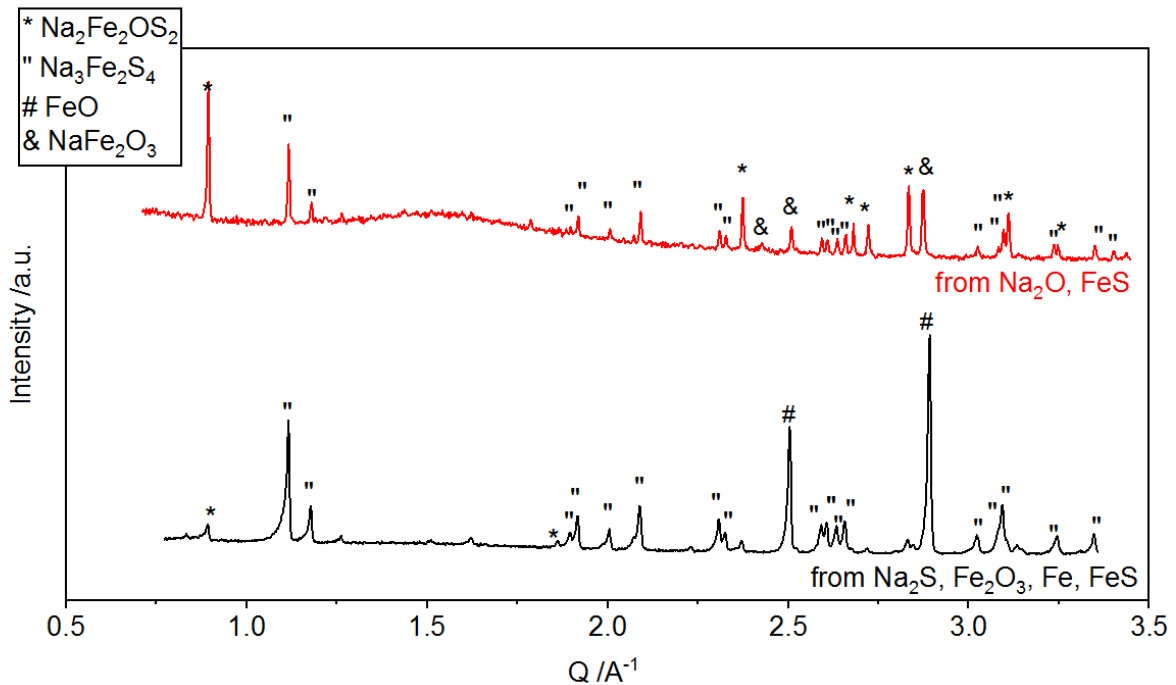

Figure S4. XRD patterns of samples reacted with different precursors at 600 °C for 6 hours  $\lambda = 1.5406 \text{ \AA}$  (red curve)  $\lambda = 0.709032 \text{ \AA}$  (black curve).

#### 1.2.4. Deviation from stoichiometry

Slight deviations from stoichiometry were considered. Indeed, as the composition of the sample refined to a slightly defective Fe content, the charge balance can be explained by the presence of some  $\text{Fe}^{3+}$  thermodynamically stabilized. Therefore, samples containing either Fe or Na deficiency were prepared, with composition  $\text{Na}_2\text{Fe}_{1.9}\text{OS}_2$  and  $\text{Na}_{1.8}\text{Fe}_2\text{OS}_2$ . Also, from the Rietveld refinement, the sum of the impurities  $\text{Na}_3\text{Fe}_2\text{S}_4$  and  $\text{FeO}$  leads to the stoichiometry  $\text{Na}_{1.5}\text{Fe}_{2.01}\text{S}_{2.03}\text{O}$ , which suggest that excess Na would be needed to obtain the desired stoichiometry of  $\text{Na}_2\text{Fe}_2\text{OS}_2$ . Na metal was then added in excess (3 % mass excess). None of these attempts were successful.

## 2. Na<sub>2</sub>Fe<sub>2</sub>OS<sub>2</sub> synthesized via solid mechanosynthesis (Na<sub>2</sub>Fe<sub>2</sub>OS<sub>2</sub>-MW)

### 2.1. Optimization of the mechanosynthesis procedure

We have used this method for the synthesis of Na<sub>2</sub>Fe<sub>2</sub>OS<sub>2</sub> by ball milling Na<sub>2</sub>O and FeS in an Argon containing grinding bowl. First, a sample having the exact stoichiometry of the desired phase was tried. The XRD pattern of this phase is shown in Figure S6a, and a Rietveld fit of the phase enabled to approximate the amount of each impurities (Figure S5).

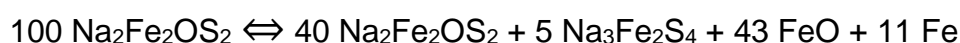

The grinding time did not influence the amount of these impurities. In order to shift the reaction to the left, changes in the precursor ratio were performed. The quantification of the ratio of the different phases suggest that most of the impurities are Fe and O rich. Therefore, an excess of Na and S was introduced thanks to the addition of Na<sub>2</sub>S precursor. Its solubility in many solvents will enable the removal of the excess Na<sub>2</sub>S after reaction. For a starting precursor ratio of 1 Na<sub>2</sub>O + 2 FeS + 0.75 Na<sub>2</sub>S (composition Na<sub>3.5</sub>Fe<sub>2</sub>S<sub>2.75</sub>O), the mechanosynthesized sample contained the crystalline phases Na<sub>2</sub>Fe<sub>2</sub>OS<sub>2</sub> and FeO, where the amount of FeO was considerably reduced compared to the sample prepared with the ideal stoichiometry (Figure S6b). As the excess Na<sub>2</sub>S could not be seen in the diffraction pattern, we concluded that it was amorphised during the ball milling step. Any greater excess Na<sub>2</sub>S led to the formation of a sulphide phase Na<sub>6</sub>FeS<sub>4</sub>. To remove the FeO impurity, samples were made at compositions calculated by: Na<sub>3.5</sub>Fe<sub>2</sub>S<sub>2.75</sub>O – x FeO. For x = 0.1 (Na<sub>3.5</sub>Fe<sub>1.9</sub>S<sub>2.75</sub>O<sub>0.9</sub>), no FeO crystalline impurity was found in the sample after reaction (Figure S6c). However, according to the Rietveld fit of the resulting phase, a small

amount of Fe metal impurity remained (Figure S5). The balanced chemical equation is:

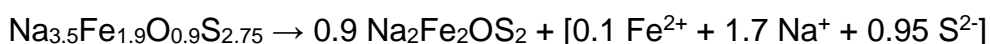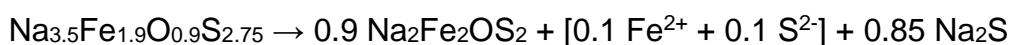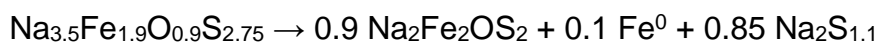

The amount of Fe metal impurity was quantified by Rietveld analysis. The mass ratio of  $\text{Na}_2\text{Fe}_2\text{OS}_2$  and Fe phases was: 96.26/3.74, which corresponds to a mole ratio 86/14, close to that calculated in the balanced chemical equation of the reaction.

In order to remove the excess  $\text{Na}_2\text{S}_x$  species, the sample was washed in methanol. Because of the relatively low solubility of  $\text{Na}_2\text{S}$  in methanol, the washing procedure was repeated 6 times to ensure its complete removal. The mechanosynthesized samples before and after washing are named  $\text{Na}_2\text{Fe}_2\text{OS}_2\text{-M}$  and  $\text{Na}_2\text{Fe}_2\text{OS}_2\text{-MW}$  respectively. A portion of the washing solution was then dried (by bringing the solution to boil under an  $\text{N}_2$  gas flow, followed by drying under vacuum). XRD of the dried methanol washing solution confirmed that the phase removed is  $\text{Na}_2\text{S}$  (Figure S7), and XPS analysis performed before and after washing the material shows a large decrease of the  $\text{Na}_2\text{S}$  contribution in the S 2*p* peaks region ( $2p_{3/2}$  peak at 161.5 eV in Figure S8) so that the sulphur peak from the material ( $2p_{3/2}$  peak at 162.2 eV) can be observed after washing. The outcome and mass balance of the washing procedure as well as the elemental analysis of the resulting powders is presented in Table S4. According to the chemical equation, the amount of  $\text{Na}_2\text{S}_x$  to be washed corresponds to 24 wt% of the total mass. The amount of powder remaining after the washing procedure corresponds to 78(1) % of the initial mass of powder before

washing. The efficiency of the washing procedure was therefore calculated to be  $22(1)/24 = 92(4) \%$ .

In an attempt to improve the crystallinity of the compound prepared by mechanosynthesis,  $\text{Na}_2\text{Fe}_2\text{OS}_2$ -M and  $\text{Na}_2\text{Fe}_2\text{OS}_2$ -MW samples were annealed in a sealed tube at  $400^\circ\text{C}$  and  $600^\circ\text{C}$  for 6 hours. This resulted in the partial decomposition of the phase with the crystallization of  $\text{Na}_3\text{Fe}_2\text{S}_4$  in particular. Additionally, a sample with the same initial composition (excess  $\text{Na}_2\text{S}$ ) was prepared via solid state route with an annealing step at  $600^\circ\text{C}$  for 6 hours. This reaction resulted in a mixed phase compound, with low amount of the desired phase. These results further confirm the metastability of  $\text{Na}_2\text{Fe}_2\text{OS}_2$  at elevated temperature.

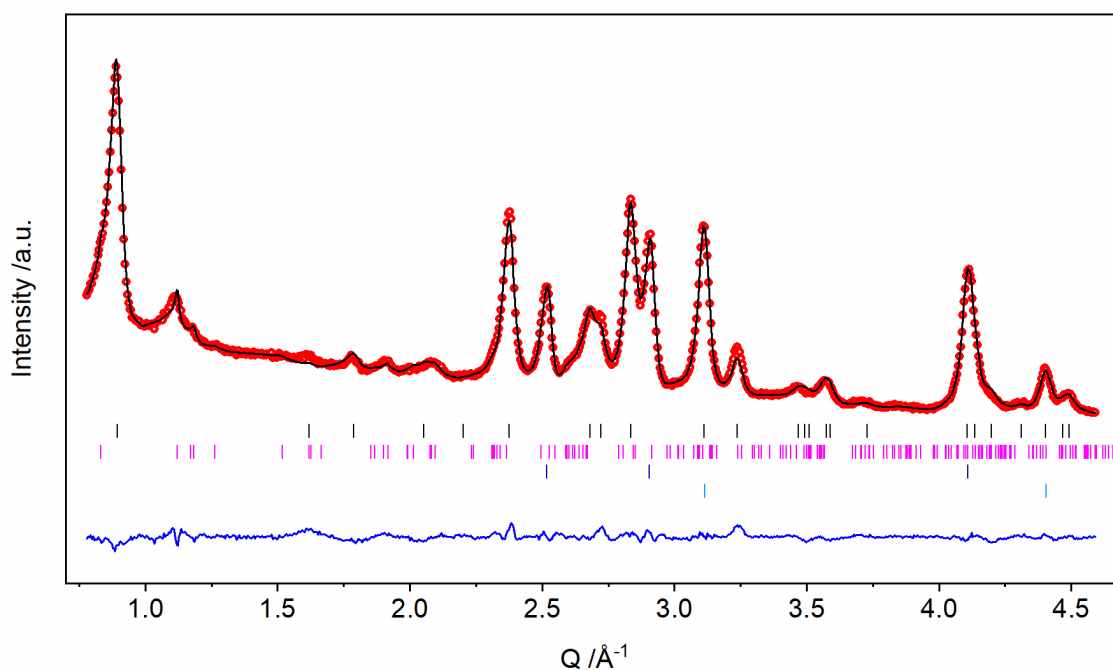

Figure S5. Rietveld refinement of the laboratory X-ray diffraction pattern of  $\text{Na}_2\text{Fe}_2\text{OS}_2$  made by mechanosynthesis from  $\text{Na}_2\text{O}$  and  $\text{FeS}$  in a 1:2 molar ratio, with  $I_{\text{obs}}$  (red dots),  $I_{\text{calc}}$  (black line),  $I_{\text{obs}} - I_{\text{calc}}$  (blue line), and Bragg reflections (black tick marks for  $\text{Na}_2\text{Fe}_2\text{OS}_2$ , pink tick marks for  $\text{Na}_3\text{Fe}_2\text{S}_4$ , blue tick marks for  $\text{FeO}$ , and light blue tick marks for  $\text{Fe}$  metal).

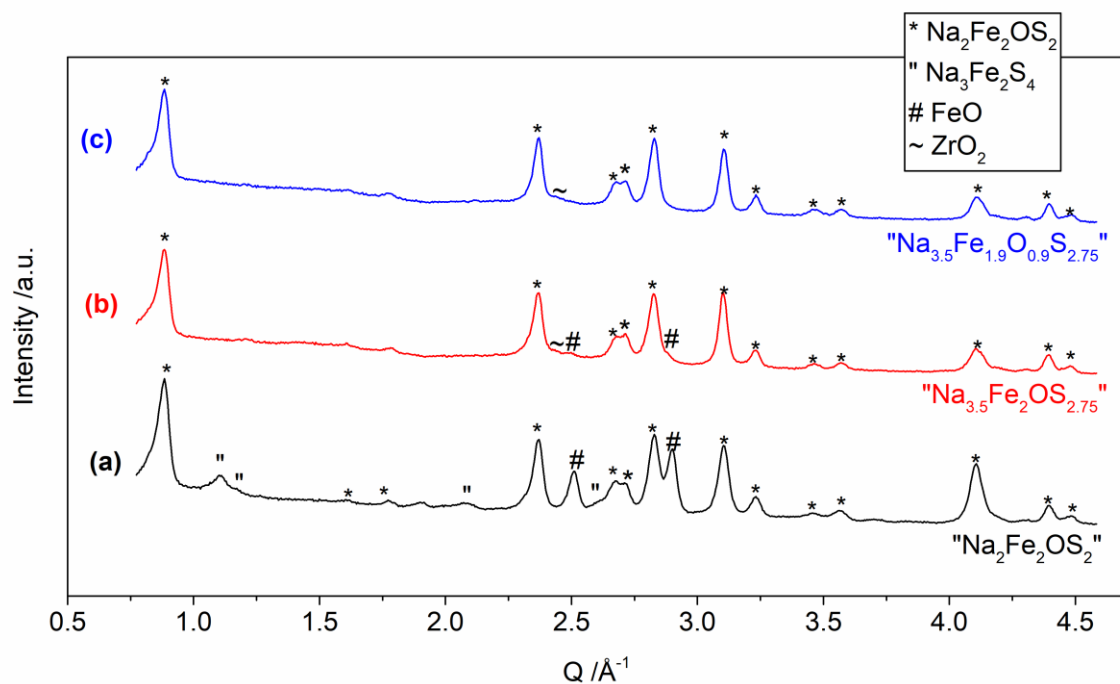

Figure S6. XRD patterns of samples made by mechano-synthesis under Ar, using  $\text{Na}_2\text{O}$ , FeS and  $\text{Na}_2\text{S}$  as precursors (stoichiometry in legend).  $\lambda = 0.70932 \text{ \AA}$ .

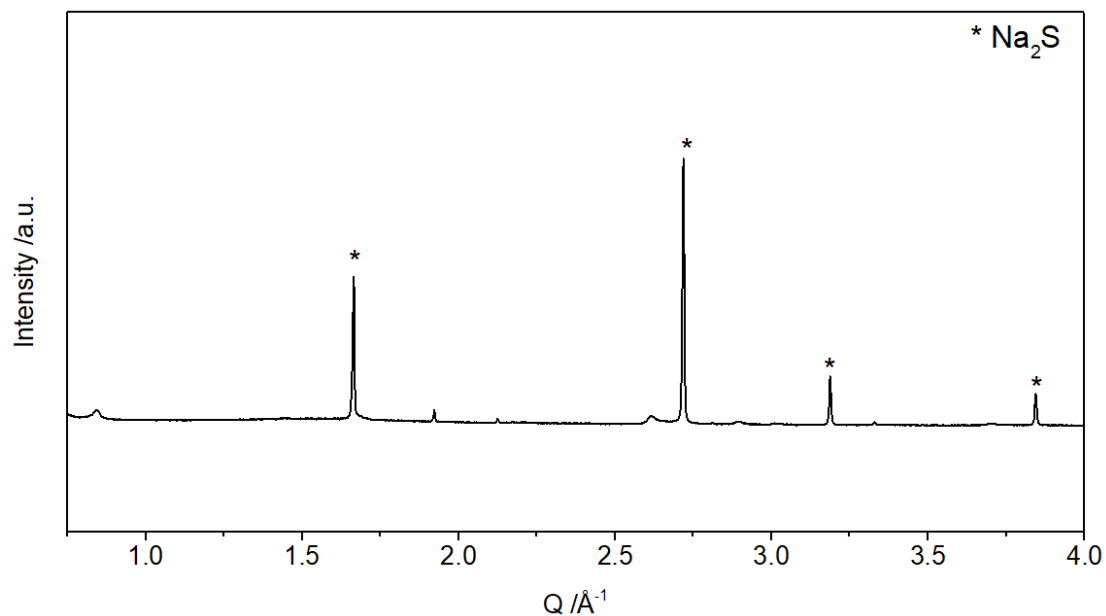

Figure S7. XRD pattern of the powder dissolved in methanol during the washing procedure.  $\lambda = 1.5406 \text{ \AA}$ .

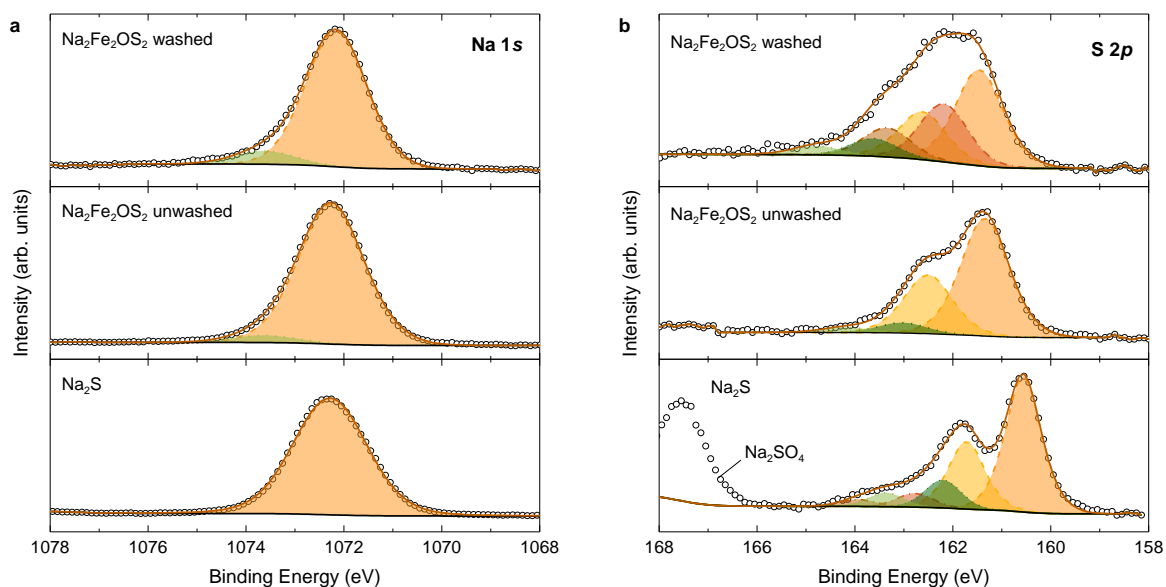

Figure S8. XPS analysis of the pristine sample before and after methanol washing. (a) The Na 1s spectra shows little variation between the different samples, including with the reference sample Na<sub>2</sub>S. (b) The S 2p spectra shows one main doublet (S 2p<sub>3/2</sub> peak at 160.9 eV) for the unwashed sample that can be ascribed to the excess Na<sub>2</sub>S on the surface. Na<sub>2</sub>S is measured as a reference, with some Na<sub>2</sub>SO<sub>4</sub> impurity. The Na<sub>2</sub>Fe<sub>2</sub>OS<sub>2</sub> sample washed in methanol shows a new doublet at higher binding energy (2p<sub>3/2</sub> peak at 162.2 eV) that we attribute to sulphur atoms in the Na<sub>2</sub>Fe<sub>2</sub>OS<sub>2</sub> phase. Sulphur atoms bonding to iron have a higher binding energy than sulphur atoms bonded only to sodium due to the higher electronegativity of iron compared to sodium.

## 2.2. Composition and microstructure

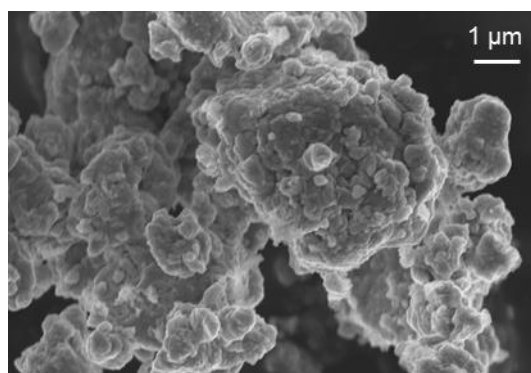

Figure S9. SEM picture of Na<sub>2</sub>Fe<sub>2</sub>OS<sub>2</sub> synthesized through mechano-synthesis

### 2.2.1. Le Bail fitting of the mechanothesized sample Na<sub>2</sub>Fe<sub>2</sub>OS<sub>2</sub>-MW

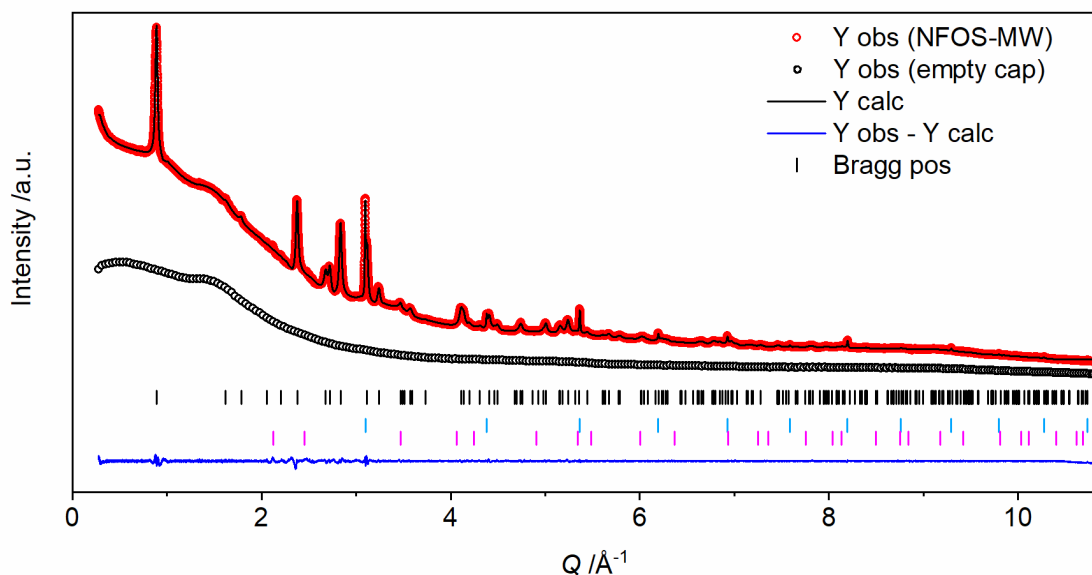

Figure S10. Le Bail fit of the Na<sub>2</sub>Fe<sub>2</sub>OS<sub>2</sub> phase, prepared by mechanoynthesis after methanol washing (Na<sub>2</sub>Fe<sub>2</sub>OS<sub>2</sub>-MW), in the *I4/mmm* space group with lattice parameters  $a = 4.0325(1)$  Å and  $c = 14.077(1)$  Å (Diamond light source, I11 beam line) with  $I_{obs}$  (red dots),  $I_{calc}$  (black line),  $I_{obs} - I_{calc}$  (blue line), and Bragg reflections (black tick marks for Na<sub>2</sub>Fe<sub>2</sub>OS<sub>2</sub>, blue tick marks for Fe, pink tick marks for ZrO<sub>2</sub>). Comparison of the diffraction pattern of Na<sub>2</sub>Fe<sub>2</sub>OS<sub>2</sub>-MW and of an empty capillary, showing the contribution of the capillary to the background.

### 2.2.2. Determination of the amount of amorphous content in Na<sub>2</sub>Fe<sub>2</sub>OS<sub>2</sub>-MW

The amount of amorphous content was determined by using the quantitative phase analysis method described in the literature.<sup>[2-4]</sup> This method consists of mixing a known amount of the Na<sub>2</sub>Fe<sub>2</sub>OS<sub>2</sub> phase with an internal standard of similar absorption coefficient and comparing the relative weight percent weighed initially with that calculated by the program. The relative weight fraction of amorphous phase in the sample,  $w_A$ , can be derived from the equation:

$$w_A = \frac{w_{R,calc} - w_{R,mes}}{w_{R,calc} - w_{R,mes} * (1 - w_{NFOS,calc})}$$

where  $w_{R,calc}$  and  $w_{NFOS,calc}$  are the weight fraction of the reference (Na<sub>3</sub>Fe<sub>2</sub>S<sub>4</sub>) and Na<sub>2</sub>Fe<sub>2</sub>OS<sub>2</sub>, respectively, to the total amount of crystalline powder calculated by Rietveld analysis,  $w_{R,mes}$  is the weight fraction of the reference to the total mass of

powder weighed experimentally. We have  $w_{R,mes} + w_{NFOS,mes} = 1$ , and by taking the amount of Fe impurity into account, we have the relations:  $w_{R,calc} + w_{NFOS,calc} + w_{Fe,calc} = 1$ .

The reference sample  $\text{Na}_3\text{Fe}_2\text{S}_4$  was prepared by solid state synthesis method by grinding  $\text{Na}_2\text{S}$  and  $\text{FeS}$  in stoichiometric amounts in an agate mortar, and heating the mixture in an alumina crucible inside a quartz tube sealed under vacuum at  $600\text{ }^\circ\text{C}$  for 12 hours (with cooling and heating ramp rates of  $5\text{ }^\circ\text{C}\cdot\text{min}^{-1}$ ). In order to get an accurate value of calculated weight fraction, the values of the Brindley coefficient for the different phases need to be determined. This parameter accounts for microabsorption effects that become non-negligible when the difference in linear absorption coefficient and particle size is different between the two phases.<sup>[5,6]</sup> Its value is tabulated in the literature and only requires knowledge of the value of  $(\mu_j - \mu)R$ , where  $\mu_j$  is the linear absorption coefficient of phase  $j$ ,  $\mu$  is the mean average linear absorption coefficient of the sample ( $\mu = \sum \mu_j w_{j,mes}$ ), and  $R$  the particle size. A strong error can be obtained on the latter, as it represents the average size of agglomerated grains, rather than the coherent scattering domain size. To determine this value for the reference material  $\text{Na}_3\text{Fe}_2\text{S}_4$ , a known amount of solid state synthesized  $\text{Na}_2\text{Fe}_2\text{OS}_2$  ( $\text{Na}_2\text{Fe}_2\text{OS}_2\text{-SS}$ , which does not contain any amorphous content) and  $\text{Na}_3\text{Fe}_2\text{S}_4$  were thoroughly mixed and the Brindley coefficients of both phases were varied during the Rietveld refinement of the diffraction data of these mixed phases, until the quantitative phase analysis result matched the amount weighed. A value of  $R = 40\text{ }\mu\text{m}$  was obtained for  $\text{Na}_3\text{Fe}_2\text{S}_4$ . The value of  $R$  for  $\text{Na}_2\text{Fe}_2\text{OS}_2\text{-MW}$  was estimated from the SEM image, while that of the Fe impurity, which is considered dispersed into the  $\text{Na}_2\text{Fe}_2\text{OS}_2$  powder, was taken from the value of the coherent scattering domain size from the peak profile shape of the XRD pattern (Debye



Scherrer). Then, 51.7 mg of Na<sub>2</sub>Fe<sub>2</sub>OS<sub>2</sub>-MW and 26.1 mg of Na<sub>3</sub>Fe<sub>2</sub>S<sub>4</sub> were thoroughly mixed and ground in an agate mortar for 15 min before collecting diffraction data on the mixed phases. The values of the different parameters used for the quantitative phase analysis through Rietveld refinement as well as the outcome of the analysis are reported in the table below. The errors are estimated from a maximum error on the value of *R* of 150 %.

Table S 3. Parameters used for the determination of the amorphous contribution in Na<sub>2</sub>Fe<sub>2</sub>OS<sub>2</sub>-MW thanks to the quantitative phase analysis method.

|                                                                                           | <b>Na<sub>2</sub>Fe<sub>2</sub>OS<sub>2</sub>-MW</b> | <b>Na<sub>3</sub>Fe<sub>2</sub>S<sub>4</sub></b> | <b>Fe</b>          |
|-------------------------------------------------------------------------------------------|------------------------------------------------------|--------------------------------------------------|--------------------|
| <b>Mass weighed (mg)</b>                                                                  | 51.7                                                 | 26.1                                             | (~1)               |
| <b><i>w<sub>j,mes</sub></i> (%)</b>                                                       | 66.4(5)                                              | 33.5(5)                                          | /                  |
| <b><math>\mu_j</math> (cm<sup>-1</sup>,<br/><math>\lambda = 0.826 \text{ \AA}</math>)</b> | 114.2                                                | 78.2                                             | 413                |
| <b><math>\mu</math> (cm<sup>-1</sup>)</b>                                                 | 106                                                  |                                                  |                    |
| <b><i>R</i> (cm)</b>                                                                      | 1·10 <sup>-3</sup>                                   | 4·10 <sup>-3</sup>                               | 7·10 <sup>-6</sup> |
| <b>(<math>\mu_j - \mu</math>)<i>R</i></b>                                                 | 0.01                                                 | -0.11                                            | 0.00               |
| <b>Brindley coefficient<sup>[5,6]</sup></b>                                               | 0.980                                                | 1.200                                            | 1.000              |
| <b><i>w<sub>j,calc</sub></i> (%)</b>                                                      | 42(3)                                                | 55(3)                                            | 2.3(1)             |
| <b><i>w<sub>A</sub></i> (%)</b>                                                           | 60(5)                                                | /                                                | /                  |

### 2.2.3. Elemental analysis

Table S4. Result of the methanol washing procedure.  $\text{Na}_2\text{Fe}_2\text{OS}_2\text{-M}$  is the mechanothesized sample at composition  $\text{Na}_{3.5}\text{Fe}_{1.9}\text{O}_{0.9}\text{S}_{2.75}$ ,  $\text{Na}_2\text{Fe}_2\text{OS}_2\text{-MW}$  is the same sample after methanol washing, and residue is the compound dissolved in the washing solution. Elemental analysis was performed by ICP-OES for Na, Fe (and S for the residue), and by CHNS for S in the powders.

| Sample                                        | Phases identified in the XRD pattern                                       | Expected composition          | Elemental analysis                       | Percentage of the initial total mass |
|-----------------------------------------------|----------------------------------------------------------------------------|-------------------------------|------------------------------------------|--------------------------------------|
| $\text{Na}_2\text{Fe}_2\text{OS}_2\text{-M}$  | $\text{Na}_2\text{Fe}_2\text{OS}_2$ , Fe + amorphous $\text{Na}_2\text{S}$ | Na: 3.5<br>Fe: 1.9<br>S: 2.75 | Na 3.35(5)<br>Fe 1.90(3)<br>S 2.83(2)    | 100                                  |
| $\text{Na}_2\text{Fe}_2\text{OS}_2\text{-MW}$ | $\text{Na}_2\text{Fe}_2\text{OS}_2$ , Fe (1.8(2) w%)                       | Na: 2<br>Fe: 2<br>S: 2        | Na 2.2(1)<br>Fe 2.00(1)<br>S 2.29(1)     | 78(1)                                |
| Residue                                       | $\text{Na}_2\text{S}$ + amorphous peaks                                    | Na: 2<br>Fe: 0<br>S: 1.1      | Na: 2.00(2)<br>Fe: 0.01(1)<br>S: 0.75(1) | 26(1)                                |

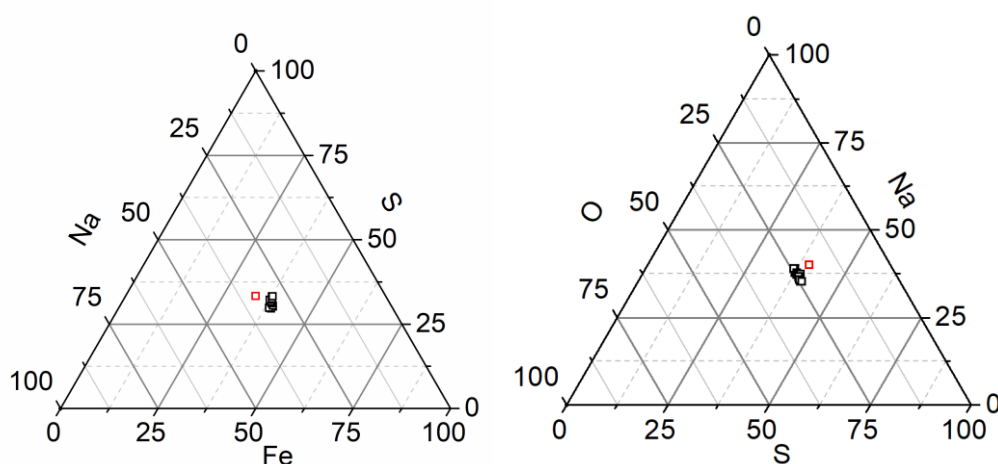

Figure S11. Elemental analysis performed by SEM-WDX on  $\text{Na}_2\text{Fe}_2\text{OS}_2\text{-MW}$  on 10 different spots in the powder (black points) and the expected composition  $\text{Na}_2\text{Fe}_2\text{OS}_2$  (red point) showing that the composition of  $\text{Na}_2\text{Fe}_2\text{OS}_2\text{-MW}$  is close to the one expected and homogeneous on the micrometer scale (spot size of the WDX probe: 1-2  $\mu\text{m}$ ).

### 2.3. Structure of mechanothesized $\text{Na}_2\text{Fe}_2\text{OS}_2$ ( $\text{Na}_2\text{Fe}_2\text{OS}_2$ -MW)

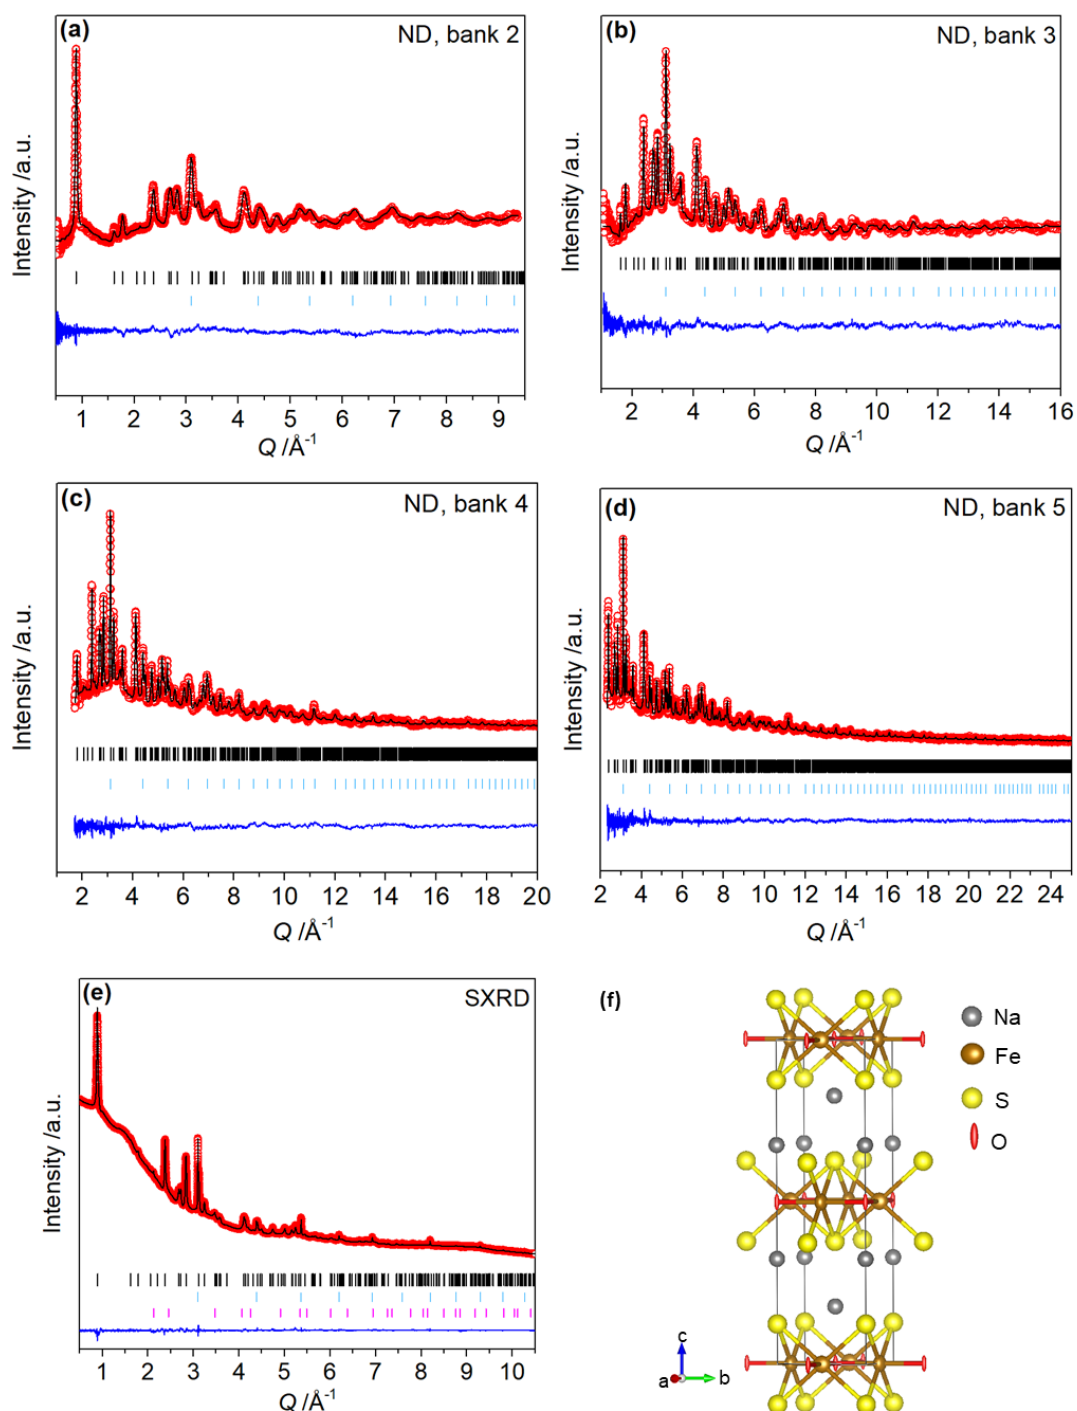

Figure S12. Final Rietveld refinement against neutron powder diffraction data (ISIS neutron source, Polaris) from (a) bank 2 ( $2\theta = 168.330^\circ$ ), (b) bank 3 ( $2\theta = 89.580^\circ$ ), (c) bank 4 ( $2\theta = 30.000^\circ$ ), (d) bank 5 ( $2\theta = 30.000^\circ$ ), and (e) against synchrotron X-ray diffraction (Diamond light source, I11 beam line) of  $\text{Na}_2\text{Fe}_2\text{OS}_2$  ( $\text{Na}_2\text{Fe}_2\text{OS}_2$ -MW), with  $I_{\text{obs}}$  (red dots),  $I_{\text{calc}}$  (black line),  $I_{\text{obs}} - I_{\text{calc}}$  (blue line), and Bragg reflections (black tick marks for  $\text{Na}_2\text{Fe}_2\text{OS}_2$ , blue tick marks for Fe, and pink tick marks for  $\text{ZrO}_2$ ). Contribution of the capillary to the background of the pattern is shown in Figure S10. (f) Structure of  $\text{Na}_2\text{Fe}_2\text{OS}_2$  from the refined model, with atoms shown as displacement ellipsoid with a probability of 90 %.

Table S5. Result of the Rietveld refinement of Na<sub>2</sub>Fe<sub>2</sub>OS<sub>2</sub> prepared by mechano-synthesis after (Na<sub>2</sub>Fe<sub>2</sub>OS<sub>2</sub>-MW) methanol washing.

| Identifier                                                                | Na <sub>2</sub> Fe <sub>2</sub> OS <sub>2</sub> -MW                |                        |                        |                        |                        |
|---------------------------------------------------------------------------|--------------------------------------------------------------------|------------------------|------------------------|------------------------|------------------------|
| Radiation                                                                 | SXRD                                                               | ND, bank 2             | ND, bank 3             | ND, bank 4             | ND, bank 5             |
| Empirical formula                                                         | Na <sub>1.98(4)</sub> Fe <sub>1.96(4)</sub> S <sub>1.98(2)</sub> O |                        |                        |                        |                        |
| Formula weight (g·mol <sup>-1</sup> )                                     | 237.8                                                              |                        |                        |                        |                        |
| Space group                                                               | I4/mmm                                                             |                        |                        |                        |                        |
| Z                                                                         | 2                                                                  |                        |                        |                        |                        |
| Density (g·cm <sup>-3</sup> )                                             | 3.450                                                              |                        |                        |                        |                        |
| Temperature (K)                                                           | 298                                                                |                        |                        |                        |                        |
| Wavelength (Å)<br>Angle (°) /                                             | 0.82654(1)                                                         | 25.990                 | 52.210                 | 92.590                 | 146.720                |
| d spacing range (Å)                                                       | 0.5335 - 22.7255                                                   | 0.5788 - 13.9828       | 0.2807 - 5.9297        | 0.1614 - 3.6944        | 0.1857 - 2.6986        |
| TOF (μsec.) / 2θ (°) range                                                | 2.0840 - 92.1120                                                   | 1208.0513 - 24884.8281 | 1107.6846 - 19936.9336 | 1107.3549 - 19937.9629 | 1103.8363 - 19944.8594 |
| TOF (μsec.) / 2θ (°) step                                                 | 0.004                                                              | 7.8244                 | 6.5131                 | 6.5135                 | 3.2546                 |
| No. of reflections                                                        | 277                                                                | 219                    | 1632                   | 7932                   | 5300                   |
| No. of refined parameters                                                 | 16 (profile)<br>16 (atomic)                                        |                        |                        |                        |                        |
| a (Å)                                                                     | 4.0325(1)                                                          | 4.0304(2)              |                        |                        |                        |
| c (Å)                                                                     | 14.077(1)                                                          | 14.07(1)               |                        |                        |                        |
| Volume (Å <sup>3</sup> )                                                  | 228.91(3)                                                          | 228.5(2)               |                        |                        |                        |
| R <sub>p</sub>                                                            | 12.0                                                               | 14.1                   | 20.3                   | 20.3                   | 20.8                   |
| R <sub>wp</sub>                                                           | 8.20                                                               | 13.1                   | 13.1                   | 15.3                   | 18.7                   |
| R <sub>exp</sub>                                                          | 2.80                                                               | 7.23                   | 8.78                   | 8.65                   | 16.19                  |
| R <sub>Bragg</sub>                                                        | 2.17                                                               | 4.19                   | 13.2                   | 16.2                   | 14.1                   |
| χ <sup>2</sup>                                                            | 8.57                                                               | 3.28                   | 2.24                   | 3.14                   | 1.34                   |
| ρ <sub>min./max. residuals</sub> (barns/e <sup>-</sup> ·Å <sup>-3</sup> ) | [-2.7 / +2.8]                                                      | [-2.5 / +0.1]          | [-1.1 / +0.1]          | [-4.4 / +1.3]          | [-0.3 / +0.6]          |

Table S6. Atomic positions, isotropic ( $B_{iso}$ ), anisotropic ( $B_{11}$ ,  $B_{22}$ ,  $B_{33}$ ) and equivalent ( $B_{eq}$ ) atomic displacement parameters, and site occupancy factor ( $sof$ ) for Na<sub>2</sub>Fe<sub>2</sub>OS<sub>2</sub> prepared by mechano-synthesis after methanol washing (Na<sub>2</sub>Fe<sub>2</sub>OS<sub>2</sub>-MW) obtained from the Rietveld fit of the ND and SXRD data.

| Site | Wyckoff position | x | y   | z        | sof     | $B_{iso} / B_{11}, B_{22}, B_{33}, B_{eq}$ (Å <sup>2</sup> ) |
|------|------------------|---|-----|----------|---------|--------------------------------------------------------------|
| Na   | 4e               | 0 | 0   | 0.176(2) | 1       | 1.6(3)                                                       |
| Fe   | 4c               | 0 | 0.5 | 0        | 0.99(2) | 2.0(4), 1.0(4), 1.8(4), 2.1(5)                               |
| S    | 4e               | 0 | 0   | 0.376(3) | 0.96(4) | 2.3(5)                                                       |
| O    | 2a               | 0 | 0   | 0        | 0.98(1) | 0.1(2), 0.1(2), 1.6(9), 1.2(5)                               |

Fourier difference map : slice at  $y = 0$

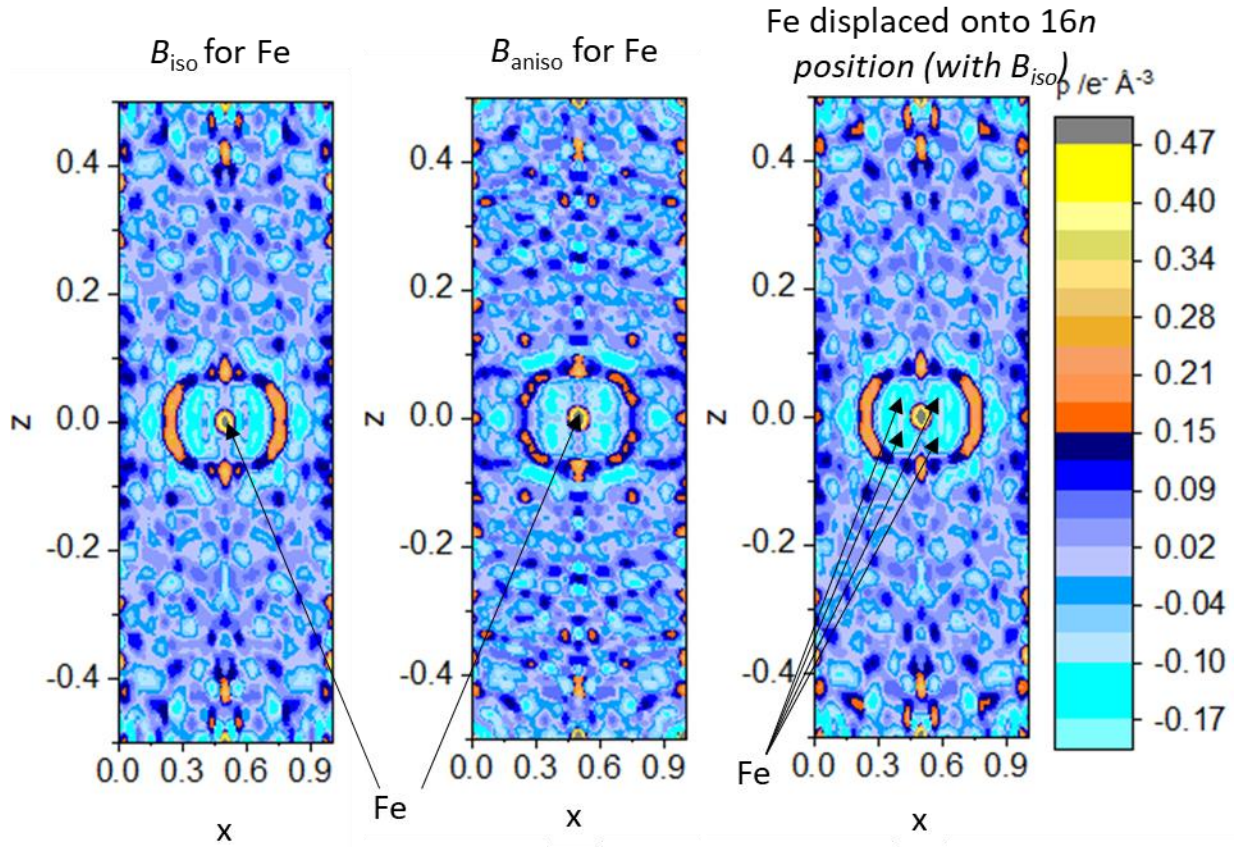

Figure S13. Fourier difference map of  $\text{Na}_2\text{Fe}_2\text{OS}_2$  ( $\text{Na}_2\text{Fe}_2\text{OS}_2$ -MW) diffraction data from neutron bank 5 using different model, with isotropic ( $B_{\text{iso}}$ ) or anisotropic ( $B_{\text{aniso}}$ ) atomic displacement parameters, showing the reduced residual density around the Fe atom when it is in  $4c$  position using  $B_{\text{aniso}}$  to model its displacement. The Fourier difference map shows that there is more residual electron density around Fe when it is split on a  $16n$  position, moreover, this model does not match better the distances obtained from the EXAFS measurement, and was therefore not selected.

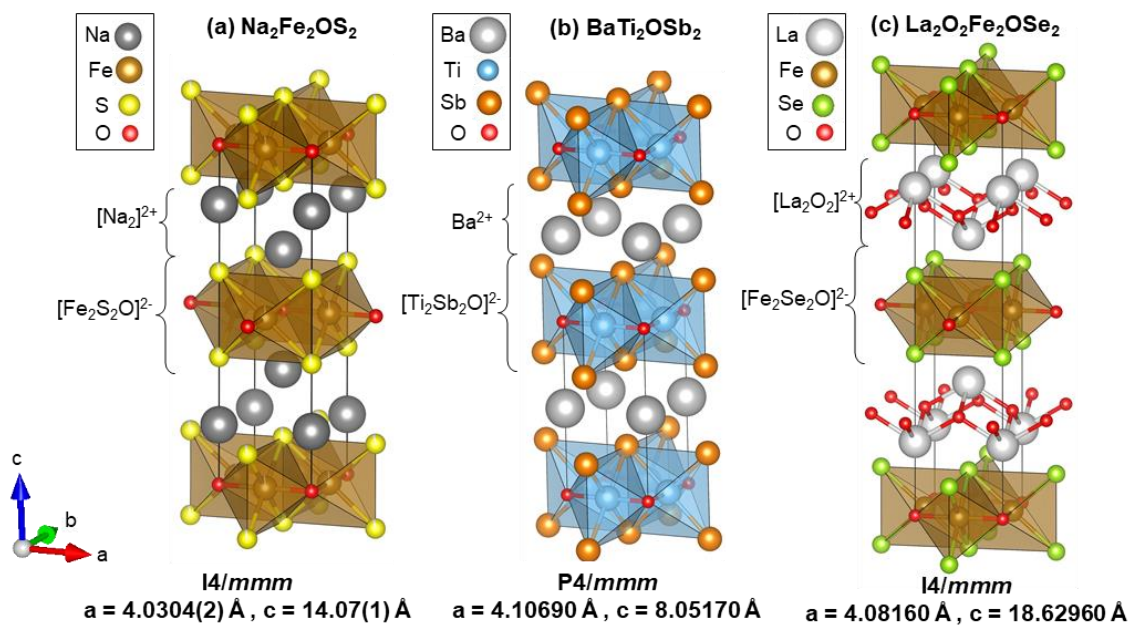

Figure S14. (a)  $\text{Na}_2\text{Fe}_2\text{OS}_2$  structure showing the  $\text{Fe}_2\text{O}$  anti- $\text{CuO}_2$  type layer and comparison with the structures of  $\text{BaTi}_2\text{OSb}_2$  (b) and  $\text{La}_2\text{O}_2\text{Fe}_2\text{OSe}_2$  (c), showing the  $[\text{M}_2\text{OQ}_2]^{2-}$  ( $M = \text{Fe}, \text{Ti}; Q = \text{S}, \text{Se}, \text{Sb}$ ) type layer alternating with a 2+ charged layer of different type.

## 2.4. Infrared spectroscopy

Table S 7. Assignment of peaks in the FTIR spectra of the  $\text{Na}_2\text{Fe}_2\text{OS}_2$  samples presented in Figure 1 and 3. Samples synthesized under Ar, synthesized under dry air and stored in dry air show the same features that we therefore assigned to the material. The sample prepared by the solid-state method shows similar peaks as well as contributions from  $\text{Na}_3\text{Fe}_2\text{S}_4$ . The sample stored in humid air mostly shows contributions from  $\text{Na}_2\text{CO}_3$ ,  $\text{H}_2\text{O}$ , OH bonds as well as other unidentified features that could correspond to Fe-based decomposition products. The sample stored under dry air also shows very weak signals from  $\text{Na}_2\text{CO}_3$  and water but no decomposition of the  $\text{Na}_2\text{Fe}_2\text{OS}_2$  phase, which could come from some low residual humidity during the experiment.

| Synthesized by solid-state      | $\text{Na}_3\text{Fe}_2\text{S}_4$ reference | Synthesized in dry air | Synthesized under Ar | Stored in dry air | Stored in air (40% RH)        | Assignment <sup>[7]</sup>           |
|---------------------------------|----------------------------------------------|------------------------|----------------------|-------------------|-------------------------------|-------------------------------------|
| Wavenumber ( $\text{cm}^{-1}$ ) |                                              |                        |                      |                   |                               |                                     |
|                                 |                                              |                        |                      |                   | 239, 249,<br>272, 283,<br>294 | unidentified                        |
| 247                             | 250                                          |                        |                      |                   |                               | $\text{Na}_3\text{Fe}_2\text{S}_4$  |
| 294                             | 286                                          |                        |                      |                   |                               |                                     |
|                                 |                                              | 316                    | 312                  | 310               |                               | $\text{Na}_2\text{Fe}_2\text{OS}_2$ |
| 320 (b)                         | 325                                          |                        |                      |                   |                               | $\text{Na}_3\text{Fe}_2\text{S}_4$  |
|                                 |                                              | 348                    | 339                  | 340               |                               | $\text{Na}_2\text{Fe}_2\text{OS}_2$ |
| 356                             | 347                                          |                        |                      |                   |                               | $\text{Na}_3\text{Fe}_2\text{S}_4$  |
|                                 |                                              |                        |                      |                   | 358                           | unidentified                        |
| 365                             | 365                                          |                        |                      |                   |                               | $\text{Na}_3\text{Fe}_2\text{S}_4$  |
| 383 (w)                         | 380 (w)                                      |                        |                      |                   |                               |                                     |
| 430                             |                                              | 452                    | 458                  | 456               |                               | $\text{Na}_2\text{Fe}_2\text{OS}_2$ |
|                                 |                                              |                        |                      |                   | 476                           | unidentified                        |
| 486                             |                                              | 493                    | 486                  | 488               |                               | $\text{Na}_2\text{Fe}_2\text{OS}_2$ |
|                                 | 525 (b)                                      |                        |                      |                   |                               | $\text{Na}_3\text{Fe}_2\text{S}_4$  |
|                                 |                                              | 629                    | 615                  | 628               |                               | $\text{Na}_2\text{Fe}_2\text{OS}_2$ |
| 665                             |                                              | 656                    | 659                  | 654               |                               |                                     |
|                                 |                                              |                        |                      |                   | 693-700                       | $\text{Na}_2\text{CO}_3$            |
| 794                             |                                              | 838                    | 820                  | 826               |                               | $\text{Na}_2\text{Fe}_2\text{OS}_2$ |
| 877 (w)                         |                                              |                        |                      | 876               | 877                           | $\text{Na}_2\text{CO}_3$            |
| 962 (w)                         |                                              | 942                    | 950                  | 969               |                               | $\text{Na}_2\text{Fe}_2\text{OS}_2$ |
|                                 | 994 (w)                                      |                        |                      |                   |                               | unidentified                        |
| 1126 (w)                        |                                              | 1110                   | 1079-1108            | 1111              | 1111                          | $\text{Na}_2\text{Fe}_2\text{OS}_2$ |
|                                 |                                              |                        |                      | 1416              | 1410-1419                     | $\text{Na}_2\text{CO}_3$            |
|                                 |                                              |                        |                      | 1577              | 1583                          | carbonate                           |
|                                 |                                              |                        |                      |                   | 3451                          | -OH                                 |
|                                 |                                              |                        |                      | 3630              | 3643                          | $\text{H}_2\text{O}$                |

b (broad), w (weak)

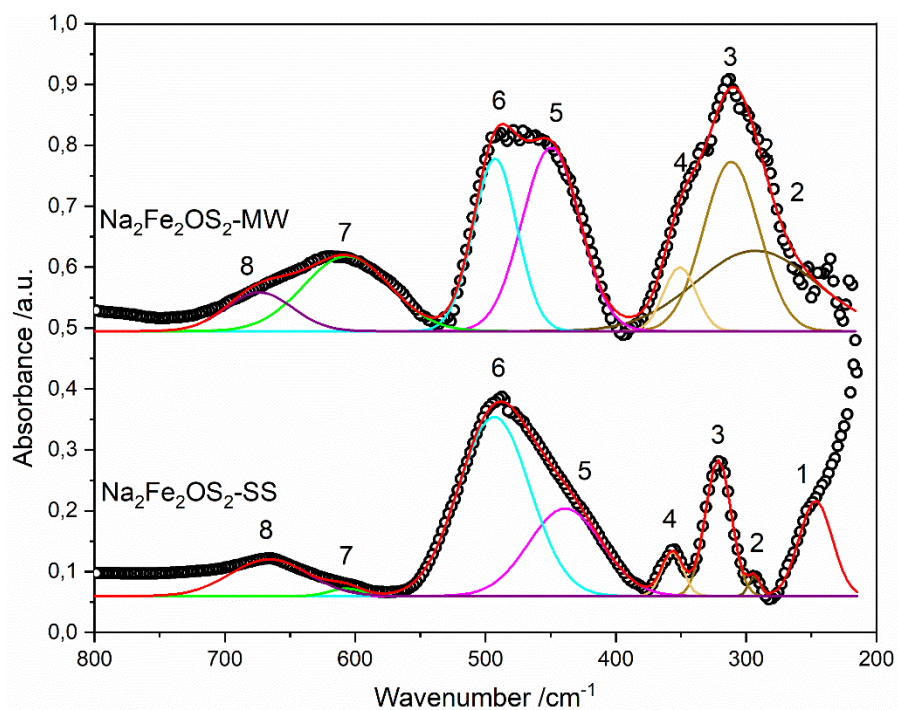

Figure S15. Experimental FTIR spectra of  $\text{Na}_2\text{Fe}_2\text{OS}_2\text{-SS}$  and  $\text{Na}_2\text{Fe}_2\text{OS}_2\text{-MW}$  (black empty circles) along with the resulting fit (red line) using a Gaussian function for each peak (contribution from each peak is shown with other color lines).



Table S8. Result of the peak fitting, using the Gaussian function, of the FTIR spectra of Na<sub>2</sub>Fe<sub>2</sub>OS<sub>2</sub>-SS and Na<sub>2</sub>Fe<sub>2</sub>OS<sub>2</sub>-MW, where  $y_0$  is the base (in a.u.);  $x_c$ , the center (in cm<sup>-1</sup>); A the area (in a.u.) and FWHM the full width at half maximum (in cm<sup>-1</sup>) of the peak. \*nf refers to “not fitted”: these parameters were fixed during the fit in order to avoid divergence.

| Peak number | Parameter | Na <sub>2</sub> Fe <sub>2</sub> OS <sub>2</sub> -SS |                | Na <sub>2</sub> Fe <sub>2</sub> OS <sub>2</sub> -MW |                |
|-------------|-----------|-----------------------------------------------------|----------------|-----------------------------------------------------|----------------|
|             |           | Value                                               | Standard Error | Value                                               | Standard Error |
| All         | $y_0$     | 0.06                                                | nf*            | 0.04                                                | nf             |
| 1           | $x_c$     | 247                                                 | nf             | /                                                   | /              |
| 1           | A         | 5                                                   | nf             | /                                                   | /              |
| 1           | FWHM      | 30                                                  | nf             | /                                                   | /              |
| 2           | $x_c$     | 294                                                 | 2              | 292                                                 | 2              |
| 2           | A         | 0.35                                                | nf             | 10.2                                                | 0.3            |
| 2           | FWHM      | 10                                                  | nf             | 109                                                 | 3              |
| 3           | $x_c$     | 321.4                                               | 0.3            | 310                                                 | 2              |
| 3           | A         | 5.6                                                 | 0.2            | 10                                                  | 0.5            |
| 3           | FWHM      | 23.4                                                | 0.8            | 50                                                  | 2              |
| 4           | $x_c$     | 356.5                                               | 0.8            | 350                                                 | 2              |
| 4           | A         | 1.5                                                 | 0.1            | 2.1                                                 | 0.4            |
| 4           | FWHM      | 19                                                  | 2              | 29                                                  | 3              |
| 5           | $x_c$     | 439                                                 | 6              | 449                                                 | 2              |
| 5           | A         | 10                                                  | 3              | 11.1                                                | 0.7            |
| 5           | FWHM      | 66                                                  | 7              | 52                                                  | 3              |
| 6           | $x_c$     | 493                                                 | 3              | 492                                                 | 1              |
| 6           | A         | 20                                                  | 3              | 8                                                   | 1              |
| 6           | FWHM      | 64                                                  | 3              | 40                                                  | 2              |
| 7           | $x_c$     | 607                                                 | nf             | 606                                                 | 2              |
| 7           | A         | 0.4                                                 | nf             | 6.8                                                 | 0.3            |
| 7           | FWHM      | 30                                                  | nf             | 78                                                  | 4              |
| 8           | $x_c$     | 666                                                 | nf             | 673                                                 | nf             |
| 8           | A         | 4.5                                                 | nf             | 2.7                                                 | 0.3            |
| 8           | FWHM      | 70                                                  | nf             | 60                                                  | nf             |

### 3. Study of electrochemical properties

#### 3.1. Rate capability of $\text{Na}_2\text{Fe}_2\text{OS}_2$

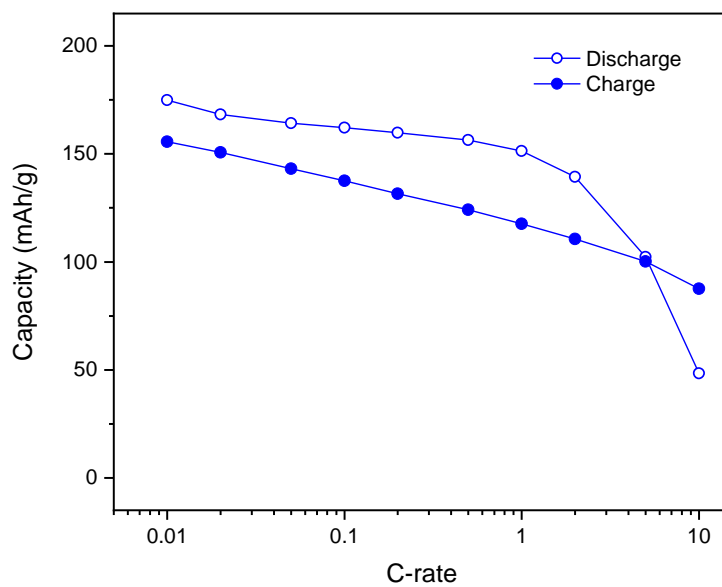

Figure S16. Signature curve of the rate capability of  $\text{Na}_2\text{Fe}_2\text{OS}_2$  measured in a 3 electrode cell using metallic Na as a counter and reference electrodes and 1M  $\text{NaPF}_6$  in EC:DMC + 2 % FEC as an electrolyte. The rate capability was measured after 3 initial cycles at C/10 between 1.5 and 3 V by applying decreasing values of C-rate from 10C to C/100 with 10 h rest periods between each rate step. For more details on this method, see M. Doyle et al.<sup>[7]</sup>

### 3.2. Reversibility of phase transition to $\text{Na}_{1.7}\text{Fe}_2\text{OS}_2$

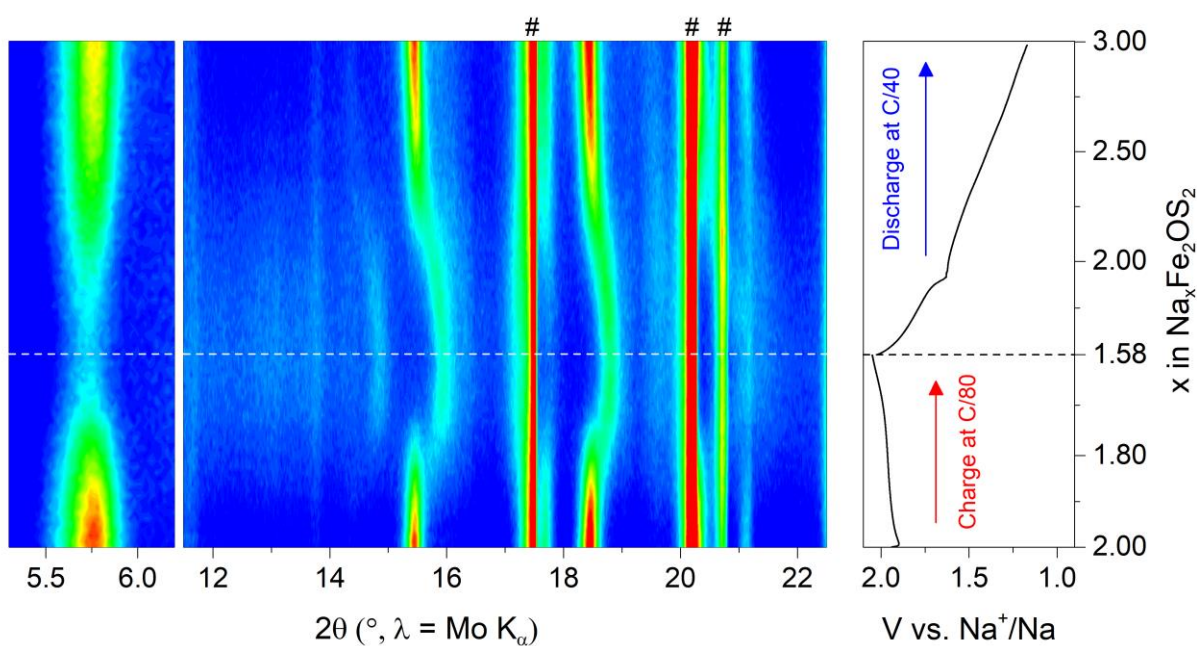

Figure S17. *In situ* XRD measurement limited to 2.05 V on charge then discharged, showing the reversibility of the structural transition between the pristine  $\text{Na}_2\text{Fe}_2\text{OS}_2$  structure and the intermediate structure of  $\text{Na}_{1.7}\text{Fe}_2\text{OS}_2$ . It takes more capacity on discharge to recover the same cell parameters as in the pristine material, although it is not clear if the discharged sample contains more Na than the pristine one. Peaks from the *in situ* setup (Be/Al) are indicated by #. A faster rate on discharge than on charge was used in the interest of time.

### 3.3. Structure determination of the partially charged sample $\text{Na}_{1.7}\text{Fe}_2\text{OS}_2$

First, identification of impurities in the sample was performed. We found some Fe (~3.6(1) w%),  $\text{Fe}_3\text{O}_4$  (~1.9(2) w%) and  $\text{ZrO}_2$  (~1.1(1) w%) to be present in small quantity in our sample. These phases were then refined along with  $\text{Na}_{1.7}\text{Fe}_2\text{OS}_2$  in all of the following analysis. Then, an attempt for Rietveld refinement was performed using a similar structural model with 15 % Na vacancies corresponding to the composition  $\text{Na}_{1.7}\text{Fe}_2\text{OS}_2$ . This model did not fit our data properly ( $\chi^2 = 30.3$  and the residual electron density was high with  $[\rho_{\min}; \rho_{\max}] = [-19.7; 3.04] \text{ e}^-/\text{\AA}^3$ , Figure S19).

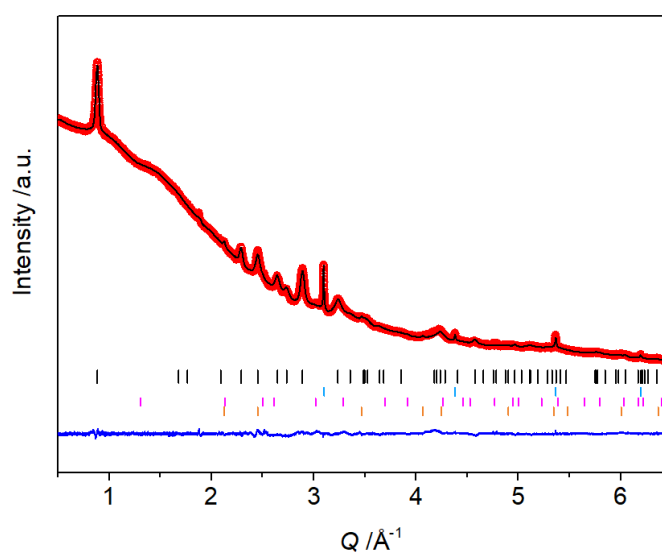

Figure S18. Le Bail fit of the  $\text{Na}_{1.7}\text{Fe}_2\text{OS}_2$  phase in the  $I4/mmm$  space group with lattice parameters  $a = 3.8814(6) \text{ \AA}$  and  $c = 14.260(3) \text{ \AA}$  (Diamond light source, I11 beam line) with  $I_{\text{obs}}$  (red dots),  $I_{\text{calc}}$  (black line),  $I_{\text{obs}} - I_{\text{calc}}$  (blue line), and Bragg reflections (black tick marks for  $\text{Na}_2\text{Fe}_2\text{OS}_2$ , blue tick marks for Fe, pink tick marks for  $\text{Fe}_3\text{O}_4$  and orange tick marks for  $\text{ZrO}_2$ ).

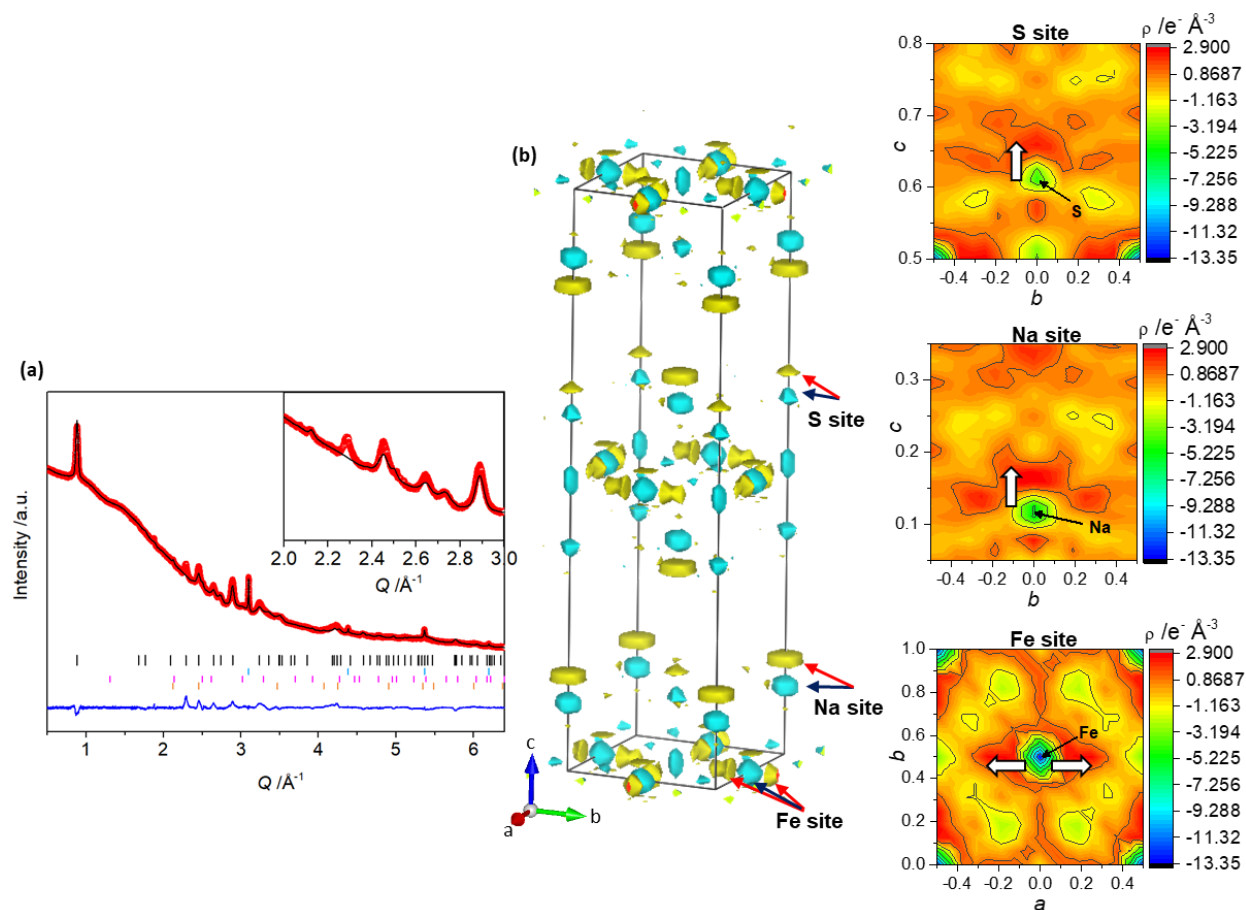

Figure S19. (a) Rietveld refinement of the synchrotron X-ray diffraction pattern of  $\text{Na}_{1.7}\text{Fe}_2\text{OS}_2$  using the model obtained for the pristine sample (Table S6, with  $\text{sof}$  of Na fixed to 0.85) (Diamond light source, I11 beam line) with  $I_{\text{obs}}$  (red dots),  $I_{\text{calc}}$  (black line),  $I_{\text{obs}}-I_{\text{calc}}$  (blue line), and Bragg reflections (black tick marks for  $\text{Na}_2\text{Fe}_2\text{OS}_2$ , blue tick marks for Fe, pink tick marks for  $\text{Fe}_3\text{O}_4$  and orange tick marks for  $\text{ZrO}_2$ ). (b) Fourier difference map of the refinement showing some positive (yellow, and red arrow) and negative (light blue and blue arrow) residual electronic density.

The Fourier difference maps highlighted regions where electron density should be removed (blue arrow on Figure S19b) or added (red arrow). In particular, the S and Na sites seemed to be displaced toward each other, whereas the Fe site appeared to be displaced in the  $(ac)$  plane on a  $16n(x, 0.5, z)$  position. The displacement required for each atom are highlighted by white arrows in the 2D Fourier difference map on Figure S19b. These positions were then refined (by dividing the occupancy of the Fe atom by four due to the change in multiplicity on this new site), first independently, then together. This enabled to improve the quality of the fit ( $\chi^2 = 22.0$  and  $[\rho_{\text{min}} ; \rho_{\text{max}}] = [-1.42 ; 2.91] \text{ e}^-/\text{\AA}^3$ ), although not satisfyingly (Figure S20). The Fourier difference

map still showed a negative residual density around the Fe site (blue arrows on Figure S20,  $-1.6 \text{ e}^-/\text{\AA}^3$ ), whereas positive around both the Na and S sites (red arrows,  $+2.98$  and  $2.36 \text{ e}^-/\text{\AA}^3$ , respectively).

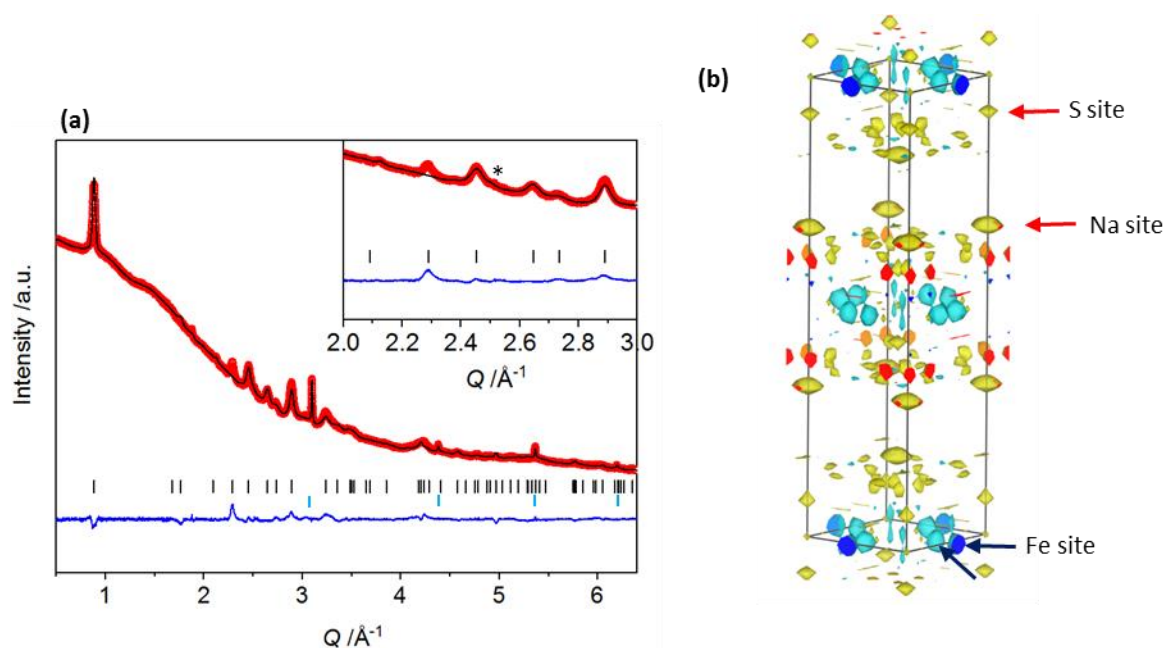

Figure S20. (a) Rietveld refinement of the synchrotron X-ray diffraction pattern of  $\text{Na}_{1.7}\text{Fe}_2\text{OS}_2$  by refining the S, Na and Fe (0,y,0) position from the model obtained for the pristine sample (Table S6, with *sof* of Na fixed to 0.85) (Diamond light source, I11 beam line) with  $I_{\text{obs}}$  (red dots),  $I_{\text{calc}}$  (black line),  $I_{\text{obs}} - I_{\text{calc}}$  (blue line), and Bragg reflections (black tick marks for  $\text{Na}_2\text{Fe}_2\text{OS}_2$  and blue tick marks for Fe, and \* for  $\text{Fe}_3\text{O}_4$ ). (b) Fourier difference map of the refinement showing some positive (yellow, and red arrow) and negative (light blue and blue arrow) residual electronic density.

The S site was split onto two positions along the z axis, the positions and occupancy and isotropic displacement parameters were refined first independently, then together, by constraining the sum of the *sof* to be equal to 1. This did not improve the fit of the pattern ( $\chi^2 = 22.2$ ). When *sof* of each atom was refined independently and successively for Fe, S and Na, the fit improved considerably ( $\chi^2 = 14.7$ ,  $[\rho_{\text{min}} ; \rho_{\text{max}}] = [-1.55 ; 2.87] \text{ e}^-/\text{\AA}^3$  and the modelled peak at  $Q = 2.3 \text{ \AA}^{-1}$  started to show some intensity). In accordance to the observed residual density in the Fourier difference map in Figure S20b, *sof* of Fe, Na and S refined to 0.75, 0.8 and 1.1 respectively, which is iron deficient compared to the expected composition  $\text{Na}_{1.7}\text{Fe}_2\text{OS}_2$ .

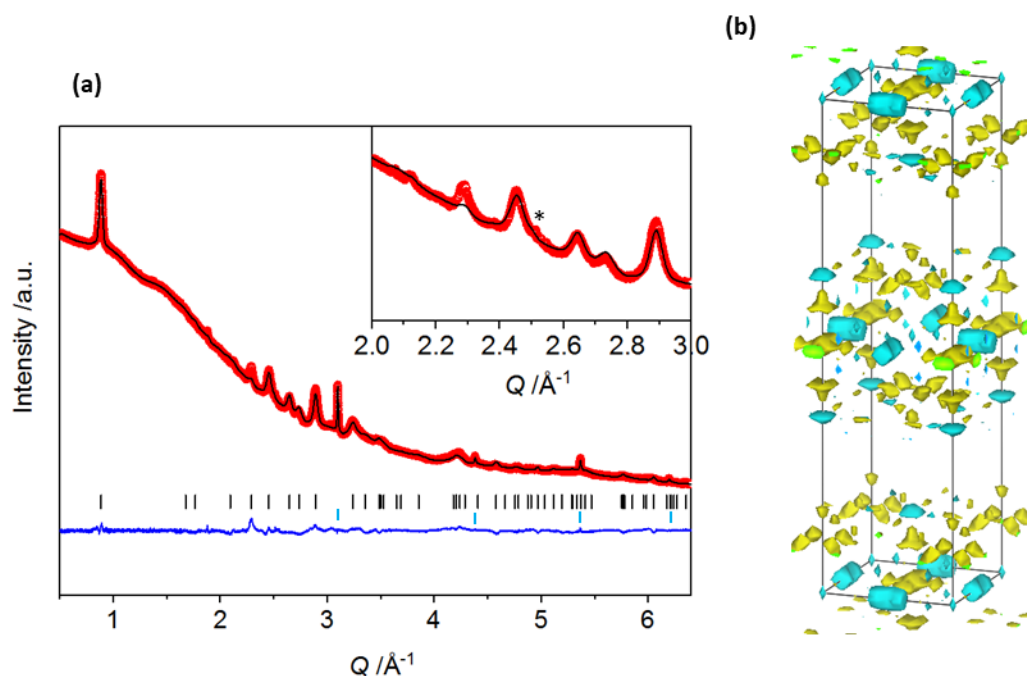

Figure S21. (a) Rietveld refinement of the synchrotron X-ray diffraction pattern of  $\text{Na}_{1.7}\text{Fe}_2\text{OS}_2$  by refining the S, Na and Fe ( $x,0.5,0$ ) positions and  $sof$  from the model initially obtained for the pristine sample (Table S6) (Diamond light source, I11 beam line) with  $I_{obs}$  (red dots),  $I_{calc}$  (black line),  $I_{obs}-I_{calc}$  (blue line), and Bragg reflections (black tick marks for  $\text{Na}_2\text{Fe}_2\text{OS}_2$  and blue tick marks for Fe, and \* for  $\text{Fe}_3\text{O}_4$ ). (b) Fourier difference map of the refinement showing some positive (yellow) and negative (light blue) residual electronic density.

In order to account for the remaining Fe and Na atoms, some Fe anti site defect onto the Na site was considered as well as some Na anti site defect onto the Fe site. First, the sum of the  $sof$  of Fe, Na and S were constrained to be equal to 1, 0.85 and 1, respectively. Then the  $sof$  of Na and S atoms were refined by keeping that of Fe and O fixed to 1. Positions and displacement parameters were then refined independently before refining all parameters together. The site splitting of S was maintained as a marked anisotropy of its displacement parameters was found along the z axis when it was only refined as one site. This yielded the final model (Figure 6c in the main text,  $\chi^2 = 9.51$ ) with refined composition  $\text{Na}_{1.6(1)}\text{Fe}_{2.0(1)}\text{OS}_{1.98(10)}$ . The outcome of the refinement is presented in Table S9 and Table S10.

Table S9. Result of the Rietveld refinement of the partially charged phase Na<sub>1.7</sub>Fe<sub>2</sub>OS<sub>2</sub> (Na<sub>1.7</sub>Fe<sub>2</sub>OS<sub>2</sub>-PC).

| Identifier                                                          | Na <sub>1.7</sub> Fe <sub>2</sub> OS <sub>2</sub> -PC            |
|---------------------------------------------------------------------|------------------------------------------------------------------|
| Radiation                                                           | SXRD                                                             |
| Empirical formula                                                   | Na <sub>1.6(1)</sub> Fe <sub>2.0(1)</sub> OS <sub>1.98(10)</sub> |
| Formula weight (g·mol <sup>-1</sup> )                               | 228.6                                                            |
| Space group                                                         | <i>I4/mmm</i>                                                    |
| Z                                                                   | 2                                                                |
| Density (g·cm <sup>-3</sup> )                                       | 3.548                                                            |
| Temperature (K)                                                     | 298                                                              |
| Wavelength (Å)                                                      | 0.82448                                                          |
| d spacing range (Å)                                                 | 0.5726 – 22.6275                                                 |
| 2θ (°) range                                                        | 2.0840 - 92.1120                                                 |
| 2θ (°) step                                                         | 0.004                                                            |
| No. of reflections                                                  | 240                                                              |
| No. of refined parameters                                           | 16 (profile), 20 (atomic)                                        |
| a (Å)                                                               | 3.8814(7)                                                        |
| c (Å)                                                               | 14.258(3)                                                        |
| Volume (Å <sup>3</sup> )                                            | 214.8(1)                                                         |
| R <sub>p</sub>                                                      | 30.1                                                             |
| R <sub>wp</sub>                                                     | 20.4                                                             |
| R <sub>exp</sub>                                                    | 6.70                                                             |
| R <sub>Bragg</sub>                                                  | 13.3                                                             |
| χ <sup>2</sup>                                                      | 9.1                                                              |
| ρ <sub>min./max.</sub> residuals (e <sup>-</sup> ·Å <sup>-3</sup> ) | [-11.4 / +3.6]                                                   |

Table S10. Atomic positions, isotropic (*B*<sub>iso</sub>) atomic displacement parameters, and site occupancy factor (*sof*) for the partially charged phase Na<sub>1.7</sub>Fe<sub>2</sub>OS<sub>2</sub> (Na<sub>1.7</sub>Fe<sub>2</sub>OS<sub>2</sub>-PC) obtained from the Rietveld fit of SXRD data.

| Site            | Wyckoff position | x        | y   | z        | sof     | <i>B</i> <sub>iso</sub> (Å <sup>2</sup> ) |
|-----------------|------------------|----------|-----|----------|---------|-------------------------------------------|
| Na              | 4e               | 0        | 0   | 0.183(5) | 0.41(3) | 1.0(1)                                    |
| Fe <sub>i</sub> | 4e               | 0        | 0   | 0.157(1) | 0.38(4) | 0.6(3)                                    |
| Fe              | 16n              | 0.102(4) | 0.5 | 0.024(2) | 0.16(3) | 0.6(3)                                    |
| Na <sub>i</sub> | 16n              | 0.102(4) | 0.5 | 0.024(2) | 0.10(3) | 1.3(3)                                    |
| S               | 4e               | 0        | 0   | 0.378(3) | 0.56(4) | 1.5(5)                                    |
| S               | 4e               | 0        | 0   | 0.349(3) | 0.43(6) | 1.5(5)                                    |
| O               | 2a               | 0        | 0   | 0        | 1       | 0.6(3)                                    |



Table S11. Selected interatomic distances and bond valence sums (BVS\*) for the partially charged phase Na<sub>1.7</sub>Fe<sub>2</sub>OS<sub>2</sub> (Na<sub>1.7</sub>Fe<sub>2</sub>OS<sub>2</sub>-PC).

| Atom                 | Distance around atom (Å) |   |             | Coordination | BVS*        |
|----------------------|--------------------------|---|-------------|--------------|-------------|
| Na                   | Na                       | S | 2.878(3) x4 | 6            | 1.63(1)     |
|                      | Na                       | S | 2.782(2) x4 |              |             |
|                      | Na                       | S | 2.792(9)    |              |             |
|                      | Na                       | S | 2.377(9)    |              |             |
|                      | Na                       | O | 2.602(8)    |              |             |
| Fe <sub>i</sub>      | Fe <sub>i</sub>          | S | 2.791(9) x4 | 6            | 1.08(2)     |
|                      | Fe <sub>i</sub>          | S | 2.746(3) x4 |              |             |
|                      | Fe <sub>i</sub>          | S | 2.739(6)    |              |             |
|                      | Fe <sub>i</sub>          | S | 3.154(6)    |              |             |
|                      | Fe <sub>i</sub>          | O | 2.240(3)    |              |             |
| Fe / Na <sub>i</sub> | Fe                       | S | 2.717(4)    | 6            | Fe: 2.28(7) |
|                      | Fe                       | S | 2.080(5)    |              |             |
|                      | Fe                       | S | 3.127(5)    |              |             |
|                      | Fe                       | S | 2.592(5)    |              |             |
|                      | Fe                       | S | 2.951(4)    |              |             |
|                      | Fe                       | S | 2.377(5)    |              |             |
|                      | Fe                       | S | 2.935(5)    |              |             |
|                      | Fe                       | S | 3.416(6)    |              |             |
|                      | Fe                       | O | 2.010(7) x2 |              |             |

### 3.4. Local structure around Fe atoms by EXAFS analysis

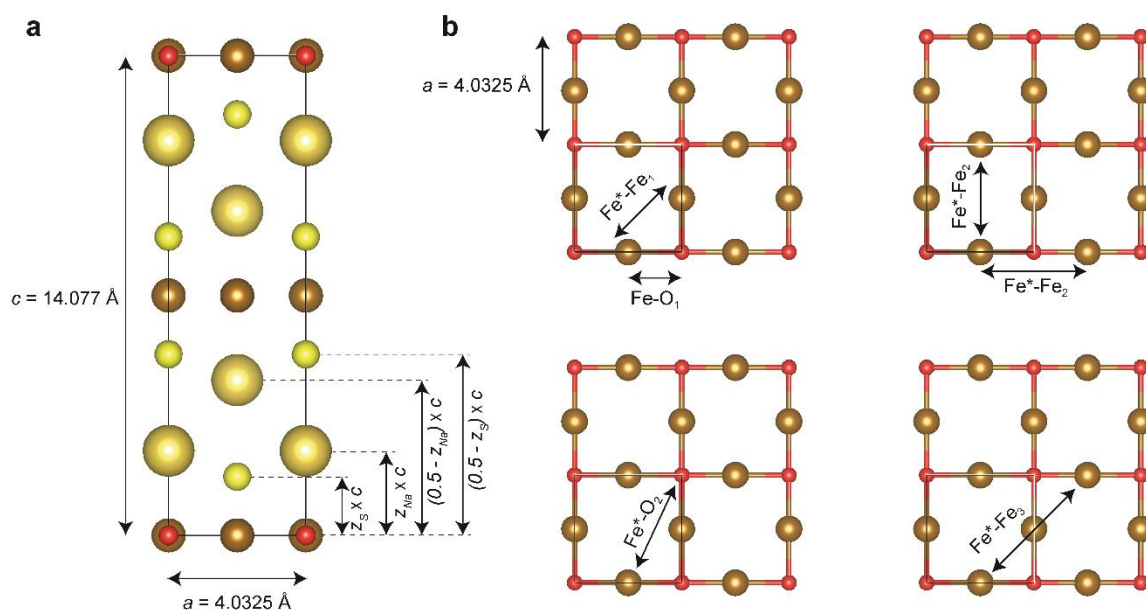

Figure S22. Geometrical parametrization of scattering paths for EXAFS analysis of the crystalline  $\text{Na}_2\text{Fe}_2\text{OS}_2$  phase, based on lattice parameters and atomic position extracted from diffraction data. (a) Height of different atoms along the  $c$ -axis and (b) distances of Fe and O atoms in the  $ab$  plane. The geometrical formula used for individual scattering paths are listed in Table S12.

Table S12. List of scattering paths used to model the EXAFS data of the crystalline Na<sub>2</sub>Fe<sub>2</sub>OS<sub>2</sub> phase and their geometrical parametrization based on crystallographic parameters.

| Scattering path                                                                     | Type                | Parametrization                                                   |
|-------------------------------------------------------------------------------------|---------------------|-------------------------------------------------------------------|
| Fe <sup>*</sup> -O <sub>1</sub> -Fe <sup>*</sup>                                    | single scattering   | $\frac{a}{2}$                                                     |
| Fe <sup>*</sup> -S <sub>1</sub> -Fe <sup>*</sup>                                    | single scattering   | $\sqrt{\left(\frac{a}{2}\right)^2 + (z_s \times c)^2}$            |
| Fe <sup>*</sup> -Fe <sub>1</sub> -Fe <sup>*</sup>                                   | single scattering   | $\frac{a\sqrt{2}}{2}$                                             |
| Fe <sup>*</sup> -Na <sub>1</sub> -Fe <sup>*</sup>                                   | single scattering   | $\sqrt{\left(\frac{a}{2}\right)^2 + (z_{Na} \times c)^2}$         |
| Fe <sup>*</sup> -Fe <sub>2</sub> -Fe <sup>*</sup>                                   | single scattering   | $a$                                                               |
| Fe <sup>*</sup> -O <sub>1</sub> -Fe <sub>2</sub> -Fe <sup>*</sup>                   | multiple scattering |                                                                   |
| Fe <sup>*</sup> -O <sub>1</sub> -Fe <sub>2</sub> -O <sub>1</sub> -Fe <sup>*</sup>   | multiple scattering |                                                                   |
| Fe <sup>*</sup> -O <sub>2</sub> -Fe <sup>*</sup>                                    | single scattering   | $\frac{a\sqrt{5}}{2}$                                             |
| Fe <sup>*</sup> -S <sub>2</sub> -Fe <sup>*</sup>                                    | single scattering   | $\sqrt{\left(\frac{a\sqrt{5}}{2}\right)^2 + (z_s \times c)^2}$    |
| Fe <sup>*</sup> -Na <sub>2</sub> -Fe <sup>*</sup>                                   | single scattering   | $\sqrt{\left(\frac{a\sqrt{5}}{2}\right)^2 + (z_{Na} \times c)^2}$ |
| Fe <sup>*</sup> -Na <sub>3</sub> -Fe <sup>*</sup>                                   | single scattering   | $\sqrt{\left(\frac{a}{2}\right)^2 + ((0.5 - z_{Na}) \times c)^2}$ |
| Fe <sup>*</sup> -S <sub>3</sub> -Fe <sup>*</sup>                                    | single scattering   | $\sqrt{\left(\frac{a}{2}\right)^2 + ((0.5 - z_s) \times c)^2}$    |
| Fe <sup>*</sup> -Fe <sub>3</sub> -Fe <sup>*</sup>                                   | single scattering   | $a\sqrt{2}$                                                       |
| Fe <sup>*</sup> -Fe <sub>1</sub> -Fe <sub>1</sub> -Fe <sup>*</sup>                  | multiple scattering |                                                                   |
| Fe <sup>*</sup> -Fe <sub>1</sub> -Fe <sub>3</sub> -Fe <sup>*</sup>                  | multiple scattering |                                                                   |
| Fe <sup>*</sup> -Fe <sub>1</sub> -Fe <sup>*</sup> -Fe <sub>1</sub> -Fe <sup>*</sup> | multiple scattering |                                                                   |
| Fe <sup>*</sup> -Fe <sub>1</sub> -Fe <sub>3</sub> -Fe <sub>1</sub> -Fe <sup>*</sup> | multiple scattering |                                                                   |

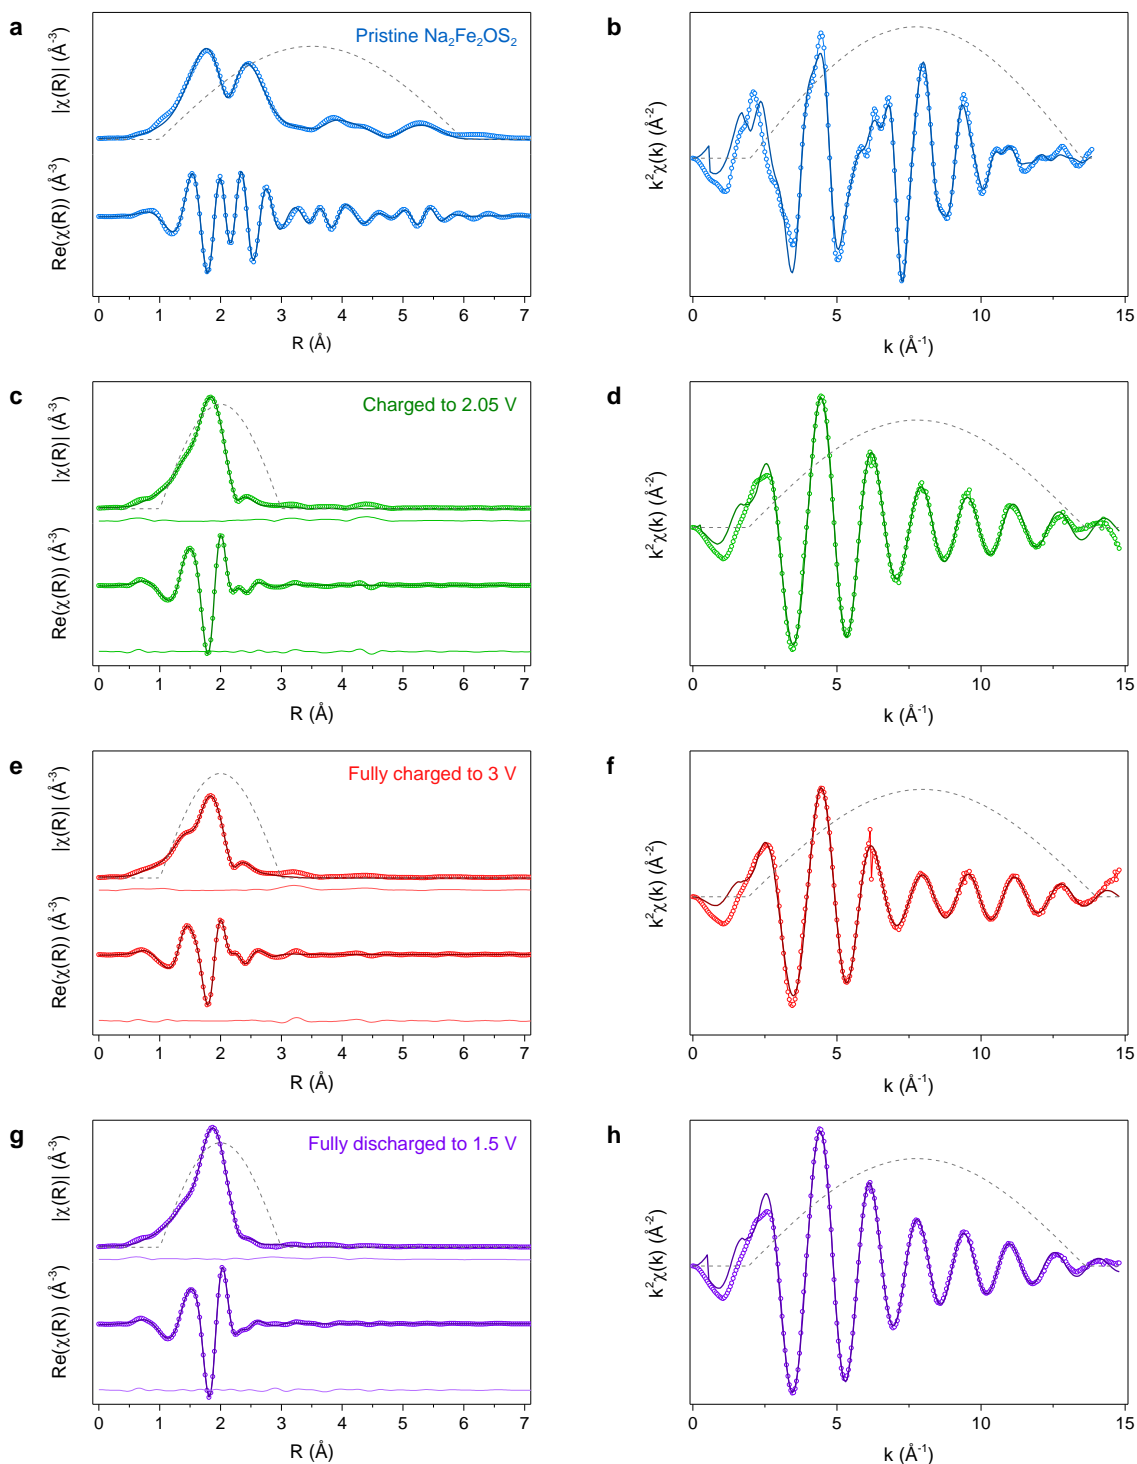

Figure S23. Result of fitting EXAFS data for the pristine (a, b), charged to 2.05 V (c, d), fully charged to 3 V (e, f) and fully discharged to 1.5 V (g, h) samples. The data are weighted by  $k^2$  in all the graphs but the fitting was carried on with data weighted by  $k$ ,  $k^2$  and  $k^3$ . The fits of the magnitude and real parts of the Fourier transform (a, c, e and g) are shown, with the corresponding windows and the residual line (light colored line below data). The fit of the data in  $k$ -space (b, d, f and h) is also shown with the corresponding window used for the Fourier transform. Experimental data is plotted with circle markers, the fit as a full line, and the sine windows used as grey dashed lines.

Table S13: Local structural parameters obtained from fitting the extended X-ray absorption fine structure for the pristine Na<sub>2</sub>Fe<sub>2</sub>OS<sub>2</sub> and cycled samples (partially charged, fully charged and fully discharged).  $\Delta E_0$  is the shift from the edge energy chosen during the background subtraction,  $S_0^2$  is the amplitude reduction factor,  $\sigma^2$  is the Debye-Waller factor and R is the half-path length of the scattering paths (equivalent to the bond distance between atoms for linear scattering paths). The k-range and R-range on which the fit is performed is indicated for each sample, with the number of independent parameter ( $N_{ind}$ ) according to the Nyquist criterion, the number of variables used ( $N_{var}$ ) and the R-factor for the final fit. The fit was done on k, k<sup>2</sup> and k<sup>3</sup>-weighted data at the same time.

| Scattering paths                                                                                            | Multiplicity | $\Delta E_0$ (eV) | $S_0^2$   | $\sigma^2$ ( $10^{-3} \text{ \AA}^2$ ) | Half-path length ( $\text{\AA}$ ) |
|-------------------------------------------------------------------------------------------------------------|--------------|-------------------|-----------|----------------------------------------|-----------------------------------|
| <b>Pristine (Na<sub>2</sub>Fe<sub>2</sub>OS<sub>2</sub>)<sup>a</sup></b>                                    |              |                   |           |                                        |                                   |
| k = 2.5-12.5 $\text{\AA}^{-1}$ , R = 1-6 $\text{\AA}$ , $N_{ind} = 30$ , $N_{var} = 15$ , R-factor = 1.62 % |              |                   |           |                                        |                                   |
| Fe*-O <sub>1</sub> -Fe*                                                                                     | 2            |                   |           | 8(2) <sup>a</sup>                      | 2.01625(5) <sup>b</sup>           |
| Fe*-S <sub>1</sub> -Fe*                                                                                     | 4            |                   |           | 9(1)                                   | 2.615(10)                         |
| Fe*-Fe <sub>1</sub> -Fe*                                                                                    | 4            |                   |           | 8(1)                                   | 2.85141(7) <sup>b</sup>           |
| Fe*-Na <sub>1</sub> -Fe*                                                                                    | 4            |                   |           | 9(3)                                   | 3.20(2)                           |
| Fe*-Fe <sub>2</sub> -Fe*                                                                                    | 4            |                   |           | 10(2)                                  | 4.03250(10) <sup>b</sup>          |
| Fe*-O-Fe <sub>2</sub> -Fe* <sup>b</sup>                                                                     | 4            |                   |           |                                        |                                   |
| Fe*-O-Fe <sub>2</sub> -O-Fe* <sup>b</sup>                                                                   | 2            |                   |           |                                        |                                   |
| Fe*-O <sub>2</sub> -Fe*                                                                                     | 4            | 1.2(7)            | 0.87(11)  | 11(7)                                  | 4.50847(11) <sup>b</sup>          |
| Fe*-S <sub>2</sub> -Fe*                                                                                     | 8            |                   |           | 16(4)                                  | 4.806(5)                          |
| Fe*-Na <sub>2</sub> -Fe*                                                                                    | 4            |                   |           | 13(6)                                  | 4.979(15)                         |
| Fe*-Na <sub>3</sub> -Fe*                                                                                    | 8            |                   |           | 13(6)                                  | 5.148(15)                         |
| Fe*-S <sub>3</sub> -Fe*                                                                                     | 4            |                   |           | 4(3)                                   | 5.739(5)                          |
| Fe*-Fe <sub>3</sub> -Fe*                                                                                    | 4            |                   |           |                                        |                                   |
| Fe*-Fe <sub>1</sub> -Fe <sub>1</sub> -Fe*                                                                   | 4            |                   |           |                                        |                                   |
| Fe*-Fe <sub>1</sub> -Fe <sub>3</sub> -Fe*                                                                   | 8            |                   |           | 14(4)                                  | 5.70282(14) <sup>b</sup>          |
| Fe*-Fe <sub>1</sub> -Fe*-Fe <sub>1</sub> -Fe*                                                               | 4            |                   |           |                                        |                                   |
| Fe*-Fe <sub>1</sub> -Fe <sub>3</sub> -Fe <sub>1</sub> -Fe*                                                  | 4            |                   |           |                                        |                                   |
| Fe*-S-Fe*<br>(amorphous phase)                                                                              | 4            | 1.2(7)            | 0.87(11)  | 9(1)                                   | 2.290(6)                          |
| <b>Charged to 2.05 V (Na<sub>1.7</sub>Fe<sub>2</sub>OS<sub>2</sub>)</b>                                     |              |                   |           |                                        |                                   |
| k = 3-12.6 $\text{\AA}^{-1}$ , R = 1-3 $\text{\AA}$ , $N_{ind} = 12$ , $N_{var} = 8$ , R-factor = 0.06 %    |              |                   |           |                                        |                                   |
| Fe*-O-Fe*                                                                                                   | 2            |                   |           | 7.9(1.1)                               | 1.917(8)                          |
| Fe*-S-Fe*                                                                                                   | 4            | 0.3(4)            | 0.340(10) | 4.0(3)                                 | 2.268(2)                          |
| Fe*-Fe-Fe* <sup>c</sup>                                                                                     | 4            |                   |           | 24(2) <sup>c</sup>                     | 2.706(10)                         |
| <b>Fully charged to 3 V (Na<sub>0.5</sub>Fe<sub>2</sub>OS<sub>2</sub>)</b>                                  |              |                   |           |                                        |                                   |
| k = 3-13 $\text{\AA}^{-1}$ , R = 1-3 $\text{\AA}$ , $N_{ind} = 12$ , $N_{var} = 8$ , R-factor = 0.09 %      |              |                   |           |                                        |                                   |
| Fe*-O-Fe*                                                                                                   | 2            |                   |           | 4.8(7)                                 | 1.878(6)                          |
| Fe*-S-Fe*                                                                                                   | 4            | -1.0(4)           | 0.268(8)  | 4.3(3)                                 | 2.256(3)                          |
| Fe*-Fe-Fe* <sup>c</sup>                                                                                     | 4            |                   |           | 18(2) <sup>c</sup>                     | 2.700(8)                          |
| <b>Fully discharged to 1.5 V (Na<sub>1.95</sub>Fe<sub>2</sub>OS<sub>2</sub>)</b>                            |              |                   |           |                                        |                                   |
| k = 3-12.6 $\text{\AA}^{-1}$ , R = 1-3 $\text{\AA}$ , $N_{ind} = 12$ , $N_{var} = 8$ , R-factor = 0.09 %    |              |                   |           |                                        |                                   |
| Fe*-O-Fe*                                                                                                   | 2            |                   |           | 12(2)                                  | 1.927(19)                         |
| Fe*-S-Fe*                                                                                                   | 4            | 1.0(6)            | 0.400(18) | 4.9(5)                                 | 2.296(5)                          |
| Fe*-Fe-Fe* <sup>c</sup>                                                                                     | 4            |                   |           | 28(3) <sup>c</sup>                     | 2.70(3)                           |

<sup>a</sup> The data was fitted considering 40% crystalline phase, and 60% of an amorphous phase. Half-path lengths in the crystalline contribution were constrained according to crystallographic parameters ( $a$ ,  $c$ ,  $z_S$ ,  $z_{Na}$ ). Lattice parameters  $a$  and  $c$  were fixed to the values of the crystallographic model while  $z_S$ ,  $z_{Na}$ ,  $\Delta E_0$ ,  $S_0^2$  and all Debye-Waller factors were refined.

<sup>b</sup> The uncertainties on the distances in the  $ab$  plane are propagated from the uncertainty on the  $a$  lattice parameter obtained from diffraction data, as  $a$  was fixed in the EXAFS model.

<sup>c</sup> The Fe Fe\*-Fe-Fe\* scattering paths was included to help fitting the first shell in the amorphous samples but is unlikely to give physical information according to the large Debye-Waller factor.

Calculation of the root mean square (rms) displacement of Fe and S from the adp.

$$U_{ij}(X) = \frac{B_{ij}(X)}{8\pi^2}$$

$$rms(X)_{ij} = \sqrt{U_{ij}(X)}$$

$$rms(X)_{Fe-S} = \sqrt{\frac{1 + ((z_{Fe} - z_S)/a/2)^2}{\frac{((z_{Fe} - z_S)/a/2)^2}{rms(Fe)_{33}} + rms(Fe)_{11}}}$$

Figure S24. Representation of the minimum and maximum Fe-S distances in Na<sub>2</sub>Fe<sub>2</sub>OS<sub>2</sub>-MW determined through the fit of diffraction data and the calculation of the rms displacement of Fe and S from the refined anisotropic tensor matrix  $U_{ij}$  and through the fit of the EXAFS data and the calculation of the rms relative displacement from the value of the refined  $\sigma^2$ . Where  $rms(X)_{ij}$  is the rms displacement of species X from the anisotropic tensor matrix  $U_{ij}(X)$  and  $B_{ij}(X)$ ,  $rms(X)_{Fe-S}$  is the rms displacement of species X along the Fe-S vector, and  $z_{Fe}$  and  $z_S$  are the z coordinate of Fe and S respectively.

Table S14. Root mean square displacements of Fe and S along a, c and Fe-S directions

| direction              | a       | c       | Fe-S    |
|------------------------|---------|---------|---------|
| $rms(Fe) / \text{\AA}$ | 0.16(7) | 0.15(7) | 0.16(7) |
| $rms(S) / \text{\AA}$  | 0.17(8) | 0.17(8) | 0.17(8) |

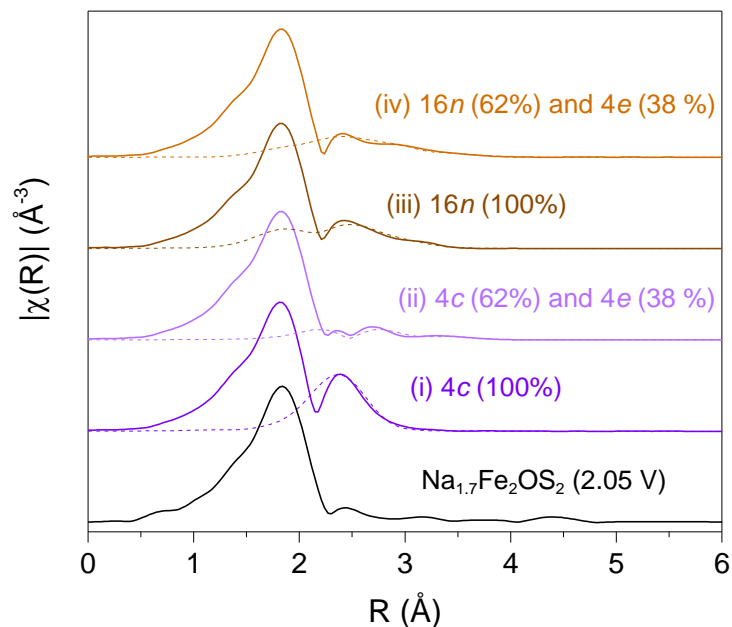

Figure S25. Simulation of EXAFS data to understand the effect of Fe partial occupation of site 4e (antisite defects) and Fe displacement from site 4c to 16n on the intensity of the magnitude of the Fourier transform. The first shell (Fe<sup>3+</sup>-O and Fe<sup>3+</sup>-S) was refined from the experimental data (see Table S13) and was kept constant for all models. Fe<sup>3+</sup>-Fe distances were simulated according to the crystallographic model. Several models were compared: (i) 100% of Fe on the 4c site (no displacement and no antisite defect); (ii) 62% of Fe on the 4c site (no displacement) and 38% on the 4e site (antisite defect); (iii) 100% of Fe on the 16n site (displaced and no antisite defect); (iv) 62% of Fe on the 16n site (displaced) and 38% on the 4e site (antisite defect). The sum of all Fe<sup>3+</sup>-Fe contributions is plotted as a dashed line and the sum of Fe<sup>3+</sup>-O, Fe<sup>3+</sup>-S and Fe<sup>3+</sup>-Fe contributions is plotted as a full line. The experimental curve for the crystalline Na<sub>1.7</sub>Fe<sub>2</sub>OS<sub>2</sub> (2.05 V) is plotted in black at the bottom for comparison, showing that the loss of intensity above 2.2 Å can be explained by antisite defects and/or displacement of Fe to a lower symmetry site.

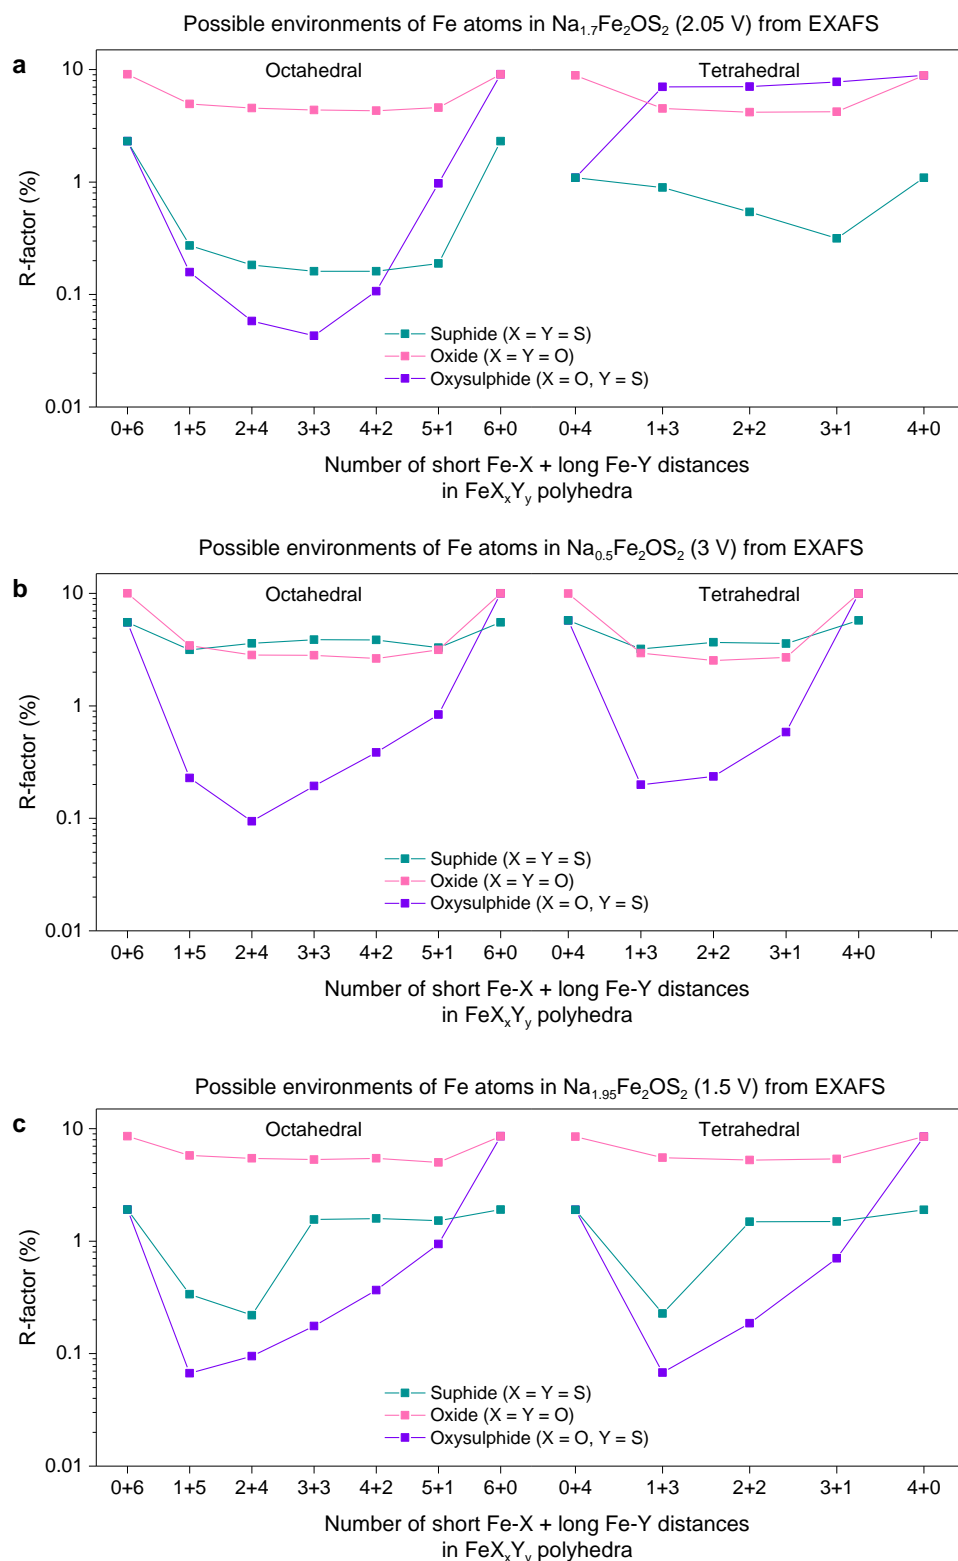

Figure S26. R-factor for different attempts to fit the EXAFS data of  $\text{Na}_{1.7}\text{Fe}_2\text{OS}_2$  charged to 2.05 V (a), the amorphous  $\text{Na}_{0.5}\text{Fe}_2\text{OS}_2$  phase charged to 3 V (b) and the amorphous  $\text{Na}_{1.95}\text{Fe}_2\text{OS}_2$  sample discharged to 1.5 V after a full cycle (c). The data was modelled as an iron oxysulphide, iron sulphide or iron oxide, with multiple combinations of short and long distances in octahedral and tetrahedral coordination environments. Mixed oxygen/sulphur configurations give better results than pure oxide or sulphide configurations. The configuration with four S and two O neighbours, which corresponds to the environment of Fe in the pristine sample, gives good results for all cycled materials.



### 3.5. Cathode degradation at high voltage and after long cycling.

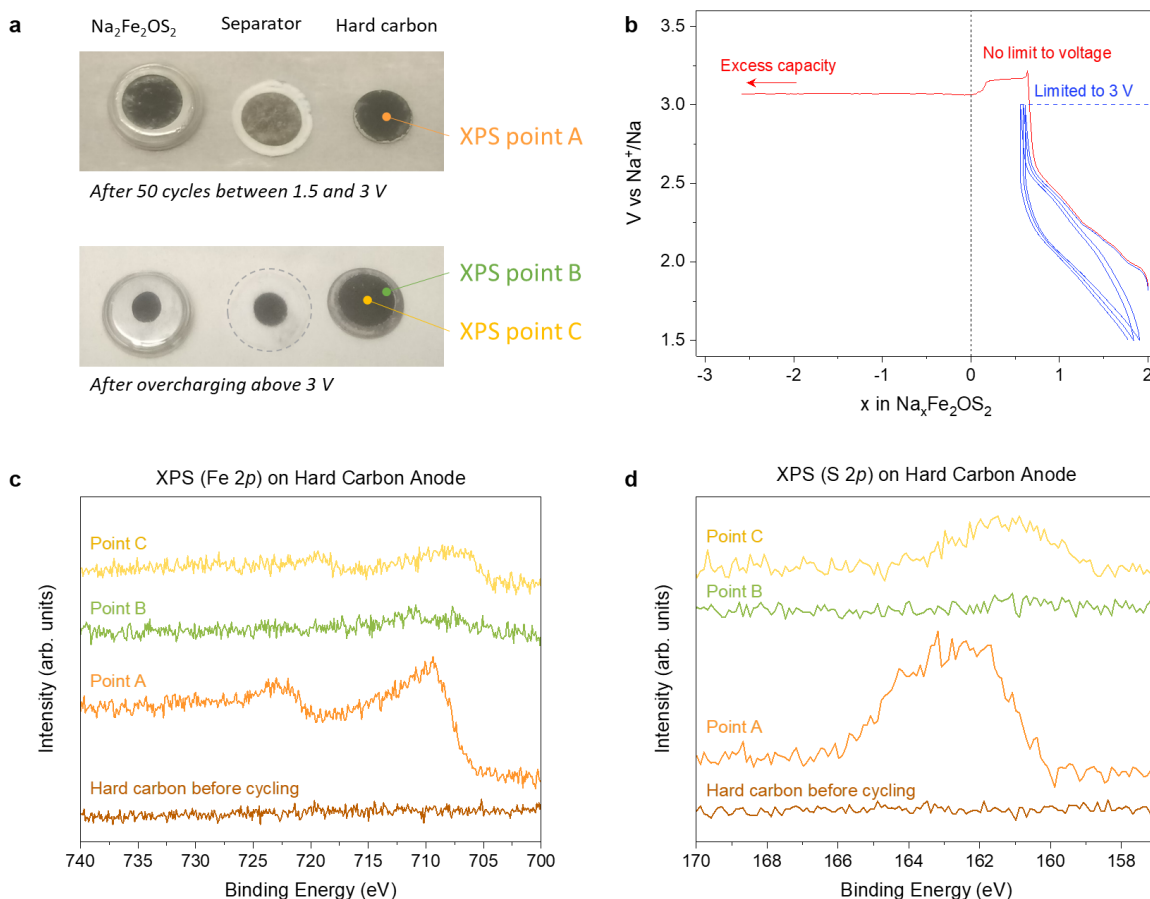

Figure S27. (a) A full cell opened after 50 cycles between 0 and 3 V shows a dark pattern on the separator (center) in front of the  $\text{Na}_2\text{Fe}_2\text{OS}_2$  electrode (left) that suggests Fe dissolution. The hard carbon anode (right) was measured by XPS (point A). Another coin cell was disassembled after a single charge above 3 V, also showing a dark pattern on the separator (center, highlighted with dashed circle) that suggests dissolution of the material. The hard carbon counter electrode was measured by XPS at two different points (point B on the side, point C in the center). (b) Electrochemical curve of  $\text{Na}_2\text{Fe}_2\text{OS}_2$  when charged above 3 V vs  $\text{Na}^+/\text{Na}$  (red curve), showing a drop in voltage around 3.2 V and an apparent infinite capacity that goes beyond the amount of Na in the material. A reversible charge/discharge curve can be obtained when the voltage is limited to 3 V vs  $\text{Na}^+/\text{Na}$  (blue curve). Both electrochemical curves were measured in 3-electrode cells with Na as a reference electrode and hard carbon as an anode. (c-d) XPS analysis of the hard carbon anode before cycling (pristine, bottom) and after different cycling conditions (point A, B and C in (a)) showing that some Fe and S dissolution happen on the cathode side, eventually depositing on the anode during cycling.

#### 4. Literature search

Reported phases were screened using both Pearson's and ICSD databases by selecting the correct elements for the search of alkali oxysulfide, or by limiting the search to *I4/mmm* and *P4/mmm* space groups for the search of other anti-RP structures.

Google scholar and Web of Science were both used for the search of cathode materials in the literature by using combinations of appropriate keywords: "oxy sulf\*", "cathode\*", "ruddlesden popper", "anti", "sodium".

References and citing articles for the paper first reporting  $\text{Na}_2\text{Fe}_2\text{OSe}_2$ <sup>[8]</sup> as well as those reporting other materials with the anti Ruddlesden-Popper structure, and the publication reporting the theoretical work on the  $\text{Na}_{4-c}\text{Li}_c\text{AX}_4$  ( $A = \text{O}$  and/or  $\text{S}$ ;  $X = \text{I}$  and/or  $\text{Cl}$ )<sup>[9]</sup> phases were closely examined and followed in order to avoid any missing information.

Table S 15. Comparison of cathode performances between  $\text{LiCoO}_2$ , candidates as cathode materials for Na-ion batteries, and  $\text{Na}_2\text{Fe}_2\text{OS}_2$ .

| Cathode material                                               | Capacity (mAh/g) | Density (g/cm <sup>3</sup> ) | Volumetric capacity (mAh/cm <sup>3</sup> ) |
|----------------------------------------------------------------|------------------|------------------------------|--------------------------------------------|
| $\text{LiCoO}_2$                                               | 140              | 4.8                          | 672                                        |
| $\text{P2-Na}_{2/3}(\text{Fe}_{1/2}\text{Mn}_{1/2})\text{O}_2$ | 140              | 4.07                         | 570                                        |
| $\text{Na}_3\text{V}_2(\text{PO}_4)_2\text{F}_3$               | 110              | 3.17                         | 349                                        |
| $\text{Na}_2\text{Fe}_2\text{OS}_2$ (this work)                | 162              | 3.41                         | 552                                        |

## References

- [1] J. F. Bézar, P. Lelann, *J. Appl. Crystallogr.* **1991**, *24*, 1.
- [2] T. Suzuki-Muresan, P. Deniard, E. Gautron, V. Petříček, S. Jobic, B. Grambow, *J Appl Crystallogr* **2010**, *43*, 1092.
- [3] A. G. De La Torre, S. Bruque, M. A. G. Aranda, *J Appl Cryst* **2001**, *34*, 196.
- [4] N. Henry, P. Deniard, S. Jobic, R. Brec, C. Fillet, F. Bart, A. Grandjean, O. Pinet, *Journal of Non-Crystalline Solids* **2004**, *333*, 199.
- [5] G. W. Brindley, *The London, Edinburgh, and Dublin Philosophical Magazine and Journal of Science* **1945**, *36*, 369.
- [6] R. J. Hill, C. J. Howard, *J Appl Cryst* **1987**, *20*, 467.
- [7] M. Doyle, J. Newman, J. Reimers, *J. Power Sources*, **1994**, *52*, 211-216.
